# Supplementary material for: Sulfonated N-heterocyclic carbenes for Suzuki coupling in water
Source: Royal Society of Chemistry journal article supplement (doi:10.1039/b703658b), 2007-01-01
Supplement: b703658b.pdf [file b703658b.pdf]

## Supporting Information

### Sulfonated N-heterocyclic Carbenes for Suzuki Coupling in Water

Christoph Fleckenstein,<sup>a</sup> Sutapa Roy,<sup>a</sup> Steffen Leuthäuser<sup>a</sup> and Herbert Plenio<sup>\*a</sup>

#### Experimental

##### General Experimental:

All chemicals were purchased as reagent grade from commercial suppliers and used without further purification, unless otherwise noted. All solvents were used as technical grade purity. DMSO (crown cap) was purchased from *Fluka*.

Proton (<sup>1</sup>H NMR), carbon (<sup>13</sup>C NMR) and phosphorus (<sup>31</sup>P NMR) nuclear magnetic resonance spectra were recorded on Bruker DRX 500 at 500 MHz, 125.75 MHz and 202.46, respectively or on Bruker DRX 300 at 300 MHz and 75.07 MHz respectively at 293 K. The chemical shifts are given in parts per million (ppm) on the delta scale ( $\delta$ ) and are referenced to residual non deuterated solvent signals. Abbreviations for NMR data: s = singlet; d = doublet; t = triplet; q = quartet; qi = quintet; sept = septet; dd = doublet of doublets; dt = doublet of triplets; dq = doublet of quartets; tt = triplet of triplets; m = multiplet. Mass spectra were recorded on a Finnigan MAT 95 magnetic sector spectrometer. Thin layer chromatography (TLC) was performed using TLC plates RP<sub>18</sub> F 254 (0.2 mm) on glass plates. Reversed phase columns for chromatography were prepared with HP-20 polymer.

GC experiments were run on a *Clarus* 500 GC with autosampler and FID detector. Column: Varian CP-Sil 8 CB (l = 15 m, d<sub>i</sub> = 0.25 mm, d<sub>F</sub> = 1.0  $\mu$ m), N<sub>2</sub> (flow: 17 cm/sec; split 1:50); Injector-temperature: 270 °C, detector temperature: 350 °C. Temperature program: isotherm 150°C for 5 min, heating to 300°C with 25 °C/min, isotherm for 15 min.

**4-sodiumsulfonato-2,6-dimethyl-aniline:** In a 500 mL 2-necked round bottomed flask 2,6-dimethylaniline (36.4 g, 300 mmol) was dropped to a mixture of conc. sulfuric acid (30.6 g, 300 mmol) and water (55 mL) within 20 min using a metal bath, the resulting clear solution was treated at 160 °C at 4 mbar without stirring to remove most of the water (30 min), a white

solid was formed. Then the temperature was raised to 260 °C for 3.5 h (baking process). The resulting grey solid was allowed to cool to 80 °C, NaOH (300 mL, 1.7 M aqueous solution) was added and the reaction mixture refluxed for additional 1.5 h. The hot mixture was filtered over a paper filter, then acidified with conc. HCl to pH 1.5. The precipitated grey solid was separated via suction filtration, suspended in water (350 mL), activated charcoal (2.0 g) was added, the solution was adjusted to pH 8 adding by Na<sub>2</sub>CO<sub>3</sub>, and the solution was refluxed for 20 min. After hot filtration of the solution some NaCl (50 g) was added and the solution allowed standing in a fridge overnight. The crystallized product was separated via suction filtration and the water removed in vacuo affording 4-sodiumsulfonato-2,6-diisopropyl-aniline as off-white crystals (34 g, 51 %).

The NMR data are identical to those in the literature (ref. 32).

**4-sodiumsulfonato-2,6-diisopropyl-aniline:** In a 500 mL two-necked round bottomed flask 2,6-diisopropylaniline (44.3 g, 250 mmol) was dropped to a mixture of conc. sulfuric acid (25.5 g, 250 mmol) and water (46 mL) within 20 min. The resulting white solid was afterwards crushed several times with a glass rod. Using a metal bath, the reaction mixture was treated at 160 °C at 4 mbar without stirring to remove most of the water. Then the temperature was raised to 260 °C for 3.5 h (baking process). The resulting grey solid was allowed to cool to 80 °C, NaOH (240 mL, 1.7 M aqueous solution) was added and the reaction mixture refluxed for additional 1.5 h. The hot mixture was filtered over a paper filter, then acidified with conc. HCl to pH 1.5. The precipitated grey solid was separated via suction filtration, suspended in water (350 mL), activated charcoal (2.0 g) was added, the pH was adjusted to 8 adding Na<sub>2</sub>CO<sub>3</sub>, and the solution was refluxed for 20 min. After hot filtration of the solution some NaCl (50 g) was added and the solution allowed to stand in a fridge overnight. The crystallized product was separated via suction filtration and the water removed in vacuo affording 4-sodiumsulfonato-2,6-diisopropyl-aniline as dark grey crystals (46 g, 66 %). The NMR data are identical to those in the literature. G. J. P. Brotovsek, G. Y. Y. Woo, N. Assavathorn, *J. Organomet. Chem.* **2003**, 679, 110.

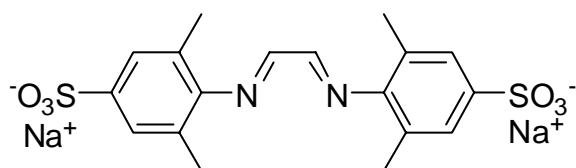

In a 2 L round-bottomed flask 4-sodiumsulfonato-2,6-dimethyl-aniline (5.0 g, 22.4 mmol) were dissolved in EtOH (150 mL, dried over CaH<sub>2</sub>). 2,3-dihydroxy-1,4-dioxane (1.22 g, 10.2

mmol) and formic acid (15 drops) were added to the clear solution. Within 30 min a yellow solid started to precipitate, the suspension was stirred for additional 48 h at room temperature. Then the yellow solid was separated via suction filtration, digested in boiling EtOH (3 times, 200 mL) to remove traces of starting material (aniline) and the volatiles removed in vacuo to afford the product as a yellow solid (1.8 g, 38 %)

$^1\text{H}$  NMR (500 MHz,  $\text{DMSO}_{d6}$ )  $\delta$  [ppm] 8.15 (s, 2 H, CH, CH=N), 7.37 (s, 4 H, CH, ar), 2.12 (s, 12 H,  $\text{CH}_3$ );  $^{13}\text{C}\{^1\text{H}\}$  NMR (125.8 MHz,  $\text{DMSO}_{d6}$ )  $\delta$  [ppm] 164.1, 150.0, 144.5, 125.8, 125.5, 18.2; MS (70 eV)  $m/z$  445 [M-Na]<sup>-</sup> (neg.), 491 [M+Na]<sup>+</sup> (pos.).

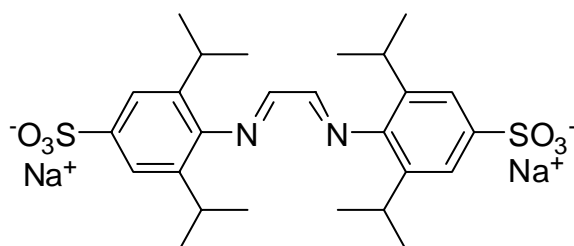

In a 250 mL round bottomed flask 4-sodiumsulfonyl-2,6-diisopropyl-aniline (13.0 g, 46.5 mmol) were dissolved in EtOH (150 mL, dried over  $\text{MgSO}_4$ ). 2,3-dihydroxy-1,4-dioxane (2.54 g, 21.2 mmol) and formic acid (7 drops) were added to the clear solution. Within 30 min a yellow solid precipitated, the suspension was stirred for additional 48 h at room temperature. Then the yellow solid was separated via suction filtration, washed with ice-cold EtOH and the volatiles removed in vacuo to afford the product as a yellow solid (12.3 g, 76 %).  $^1\text{H}$  NMR (500 MHz,  $\text{DMSO}_{d6}$ )  $\delta$  [ppm] 8.15 (s, 2 H, CH, CH=N), 7.45 (s, 4 H, CH, ar), 2.86 (sept,  $^3J = 6.9$  Hz, 4 H, CHCH<sub>3</sub>), 1.15 (d,  $^3J = 6.9$  Hz, 24 H,  $\text{CH}_3$ );  $^{13}\text{C}\{^1\text{H}\}$  NMR (125.8 MHz,  $\text{DMSO}-d_6$ )  $\delta$  [ppm] 163.8, 148.3, 144.9, 135.6, 120.8, 28.0, 23.4; MS (70 eV)  $m/z$  557 [M-Na]<sup>-</sup> (neg.), 603 [M+Na]<sup>+</sup> (pos.).

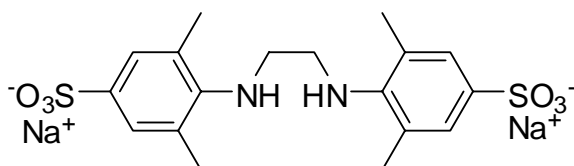

(1.01 g, 2.16 mmol) of the tetramethyldiimine were suspended in MeOH (220 mL, dried over  $\text{CaH}_2$ ). Molecular sieves (3 g, 4 Å) and Pd/C (150 mg, Pd: 10 % (w/w)) were added and the mixture hydrogenated for 2 h at 7 bar. The reaction mixture was filtered over a pad of celite to remove the catalyst and the molecular sieves and the pad was washed with MeOH (2 x 20

mL). Removal of the MeOH from the clear colourless filtrate afforded the product (0.99 g, 98 %) as a white solid

$^1\text{H}$  NMR (500 MHz,  $\text{DMSO-}d_6$ )  $\delta$  [ppm] 7.18 (s, 4 H, *CH*, ar), 4.06 (s (br), 2 H, *NH*), 3.07 (s, 4 H, *CH*), 2.20 (s, 12 H,  $\text{CH}_3$ );  $^{13}\text{C}\{^1\text{H}\}$  NMR (125.8 MHz,  $\text{DMSO-}d_6$ )  $\delta$  [ppm] 147.7, 142.1, 128.9, 127.3, 49.3, 19.9; MS (70 eV)  $m/z$  449 [ $\text{M-Na}^-$ ] (neg.), 495 [ $\text{M+Na}^+$ ] (pos.).

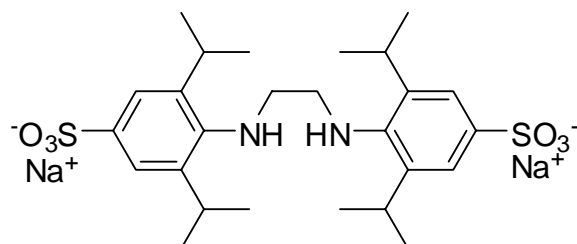

(10.1 g, 2.16 mmol) of the tetraisopropyldiimine was suspended in MeOH (220 mL, technical grade) and Pd/C (1.50 g, Pd: 10 % (w/w)) were added and the mixture hydrogenated for 6 h at 7 bar. The reaction mixture was filtered over a pad of celite to remove the catalyst and the pad was washed with MeOH (2 x 20 mL). Removal of the MeOH from the clear colourless filtrate afforded the product (10.0 g, 99 %) as a white solid.  $^1\text{H}$  NMR (500 MHz,  $\text{DMSO-}d_6$ )  $\delta$  [ppm] 7.33 (s, 4 H, *CH*, ar), 3.92 (s (br), 2 H, *NH*), 3.46-3.33 (m, H, *CHCH}\_3*), 1.17 (d,  $^3J = 6.9$  Hz, 24 H,  $\text{CH}_3$ );  $^{13}\text{C}\{^1\text{H}\}$  NMR (125.8 MHz,  $\text{DMSO-}d_6$ )  $\delta$  [ppm] 144.4, 143.1, 141.6, 121.1, 52.1, 27.3, 24.6; MS (70 eV)  $m/z$  561 [ $\text{M-Na}^-$ ] (neg.), 607 [ $\text{M+Na}^+$ ] (pos.).

### General procedure for the synthesis of sulfonated Imidazolinium salts

The respective sulfonated diamine (1 eq) and  $\text{NH}_4\text{Cl}$  (1 eq) were weighed in a round-bottom flask equipped with a reflux condenser. The solids were suspended in a mixture of EtOH (10 mL/mmol) and  $\text{HC(OEt)}_3$  (10 eq) containing one drop of  $\text{HCOOH}$ . The reaction mixture was stirred at 120 °C overnight. Afterwards the reflux condenser was replaced by a distillation head and the solvent was distilled off. The residue was again suspended in a minimum amount of EtOH and filtered off. Purification was achieved by column chromatography (HP-20) using water-methanol mixtures as eluent.

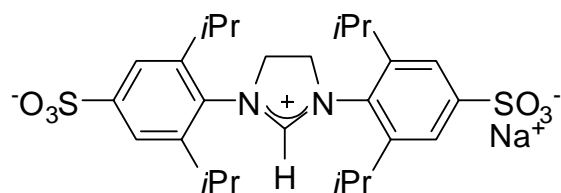

This residue (1.1 g) was purified by reversed phase column-chromatography (stationary phase: HP 20, column: 30 x 5 cm, eluent: pure water, then switched to water:MeOH (10:1)) to afford the product as an off white solid (760 mg, 76 %),  $R_f = 0.53$  (H<sub>2</sub>O:MeOH (10:1), RP-18 silica), <sup>1</sup>H NMR (500 MHz, DMSO-d<sub>6</sub>)  $\delta$  [ppm] 9.49 (s, 1 H, N-CH-N), 7.58 (s, 4 H, CH, ar), 4.53 (s, 4 H, NCH<sub>2</sub>-CH<sub>2</sub>), 3.12-3.04 (m, 4 H, CH, iPr), 1.34 (d, 3J = 6.7 Hz, 12 H, CH<sub>3</sub>), 1.19 (d, <sup>3</sup>J = 6.8 Hz, 12 H, CH<sub>3</sub>); <sup>13</sup>C{<sup>1</sup>H} NMR (125.8 MHz, DMSO-d<sub>6</sub>)  $\delta$  [ppm] 159.7, 150.2, 145.2, 129.2, 121.2, 53.1, 27.7, 24.4, 22.8.

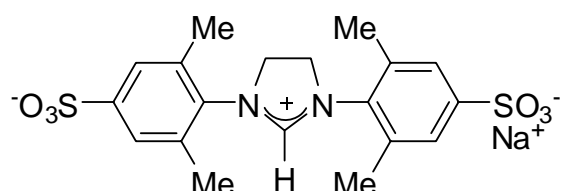

This residue (900 mg) was purified by reversed phase column-chromatography (stationary phase: HP 20, column: 30 x 5 cm, eluent : pure water, then switched to water : MeOH (10:1)) to afford the product as an off white solid (500 mg, 63 %),  $R_f = 0.50$  (H<sub>2</sub>O, RP<sub>18</sub> silica), <sup>1</sup>H NMR (500 MHz, DMSO-d<sub>6</sub>)  $\delta$  [ppm] 9.05 (s, 1 H, N-CH-N), 7.47 (s, 4 H, CH, ar), 4.48 (s, 4 H, N-CH<sub>2</sub>-CH<sub>2</sub>), 2.40 (s, 12 H, CH<sub>3</sub>); <sup>13</sup>C{<sup>1</sup>H} NMR (125.8 MHz, DMSO-d<sub>6</sub>)  $\delta$  [ppm] 160.6, 150.0, 135.7, 133.5, 126.4, 51.2, 17.7; MS (70 eV) m/z 437 [M-Na]<sup>-</sup> (neg.).

### Procedures for the synthesis of the Imidazolium salts

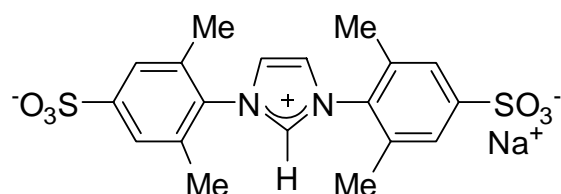

In a 25 mL Schlenk tube the tetramethyldiimine (1.22 g, 2.6 mmol) was suspended in DMSO (13 mL) and chloromethylpivalate (577 mg, 3.8 mmol) was added. The reaction mixture was stirred at 45 °C for 3 days. Then the DMSO was removed in vacuo to leave a brownish solid. This residue was purified by reversed phase column-chromatography (stationary phase: HP 20, column: 30 x 5 cm, eluent: pure water, then switched to water : MeOH (40:1)) to afford

the product as an off white solid (1.10 g, 92 %),  $R_f = 0.55$  ( $H_2O$ ,  $RP_{18}$  silica),  $^1H$  NMR (500 MHz,  $DMSO_{d6}$ )  $\delta$  [ppm] 9.73 (t,  $^4J = 1.5$  Hz, 1 H, N-CH-N), 8.32 (d,  $^4J = 1.5$  Hz, 2 H, N-CH-CH), 7.57 (s, 4 H, CH, ar), 2.17 (s, 12 H,  $CH_3$ );  $^{13}C\{^1H\}$  NMR (125.8 MHz,  $DMSO_{d6}$ )  $\delta$  [ppm] 150.8, 138.9, 134.6, 133.4, 126.2, 125.0, 17.4; MS (70 eV)  $m/z$ . 511.2  $[M+Na]^+$  (pos.).

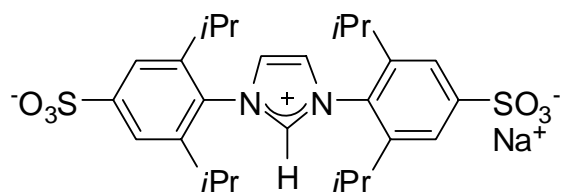

In a 25 mL Schlenk tube the tetraisopropyl-diimine (2.03 g, 3.5 mmol) was suspended in DMSO (13 mL) and chloromethylpivalate (774 mg, 5.14 mmol) was added. The reaction mixture was stirred at 45 °C for 3 days. Then the DMSO was removed in vacuo to leave a brownish solid. This residue was purified by reversed phase column-chromatography (stationary phase: HP 20, column: 30 x 5 cm, eluent: pure water, then switched to water:MeOH (10:1)) to afford the product as an off white solid (1.9 g, 95 %),  $R_f = 0.50$  ( $H_2O$ :MeOH (10:1),  $RP_{18}$  silica),  $^1H$  NMR (500 MHz,  $DMSO_{d6}$ )  $\delta$  [ppm] 10.22 (t,  $^4J = 1.5$  Hz, 1 H, N-CH-N), 8.57 (d,  $^4J = 1.5$  Hz, 2 H, N-CH-CH), 7.67 (s, 4 H, CH, ar), 2.40-2.34 (m, 4 H, CH, iPr), 1.26 (d,  $^3J = 7.0$  Hz, 12 H,  $CH_3$ ), 1.16 (d,  $^3J = 8.5$  Hz, 12 H,  $CH_3$ );  $^{13}C\{^1H\}$  NMR (125.8 MHz,  $DMSO_{d6}$ )  $\delta$  [ppm] 152.6, 145.5, 140.5, 130.9, 127.3, 122.5, 29.7, 25.1, 24.1; MS (70 eV)  $m/z$  593  $[M+Na]^+$  (pos.), 547  $[M-Na]^-$  (neg.).

# Scanned NMR of spectra of the newly synthesized compounds

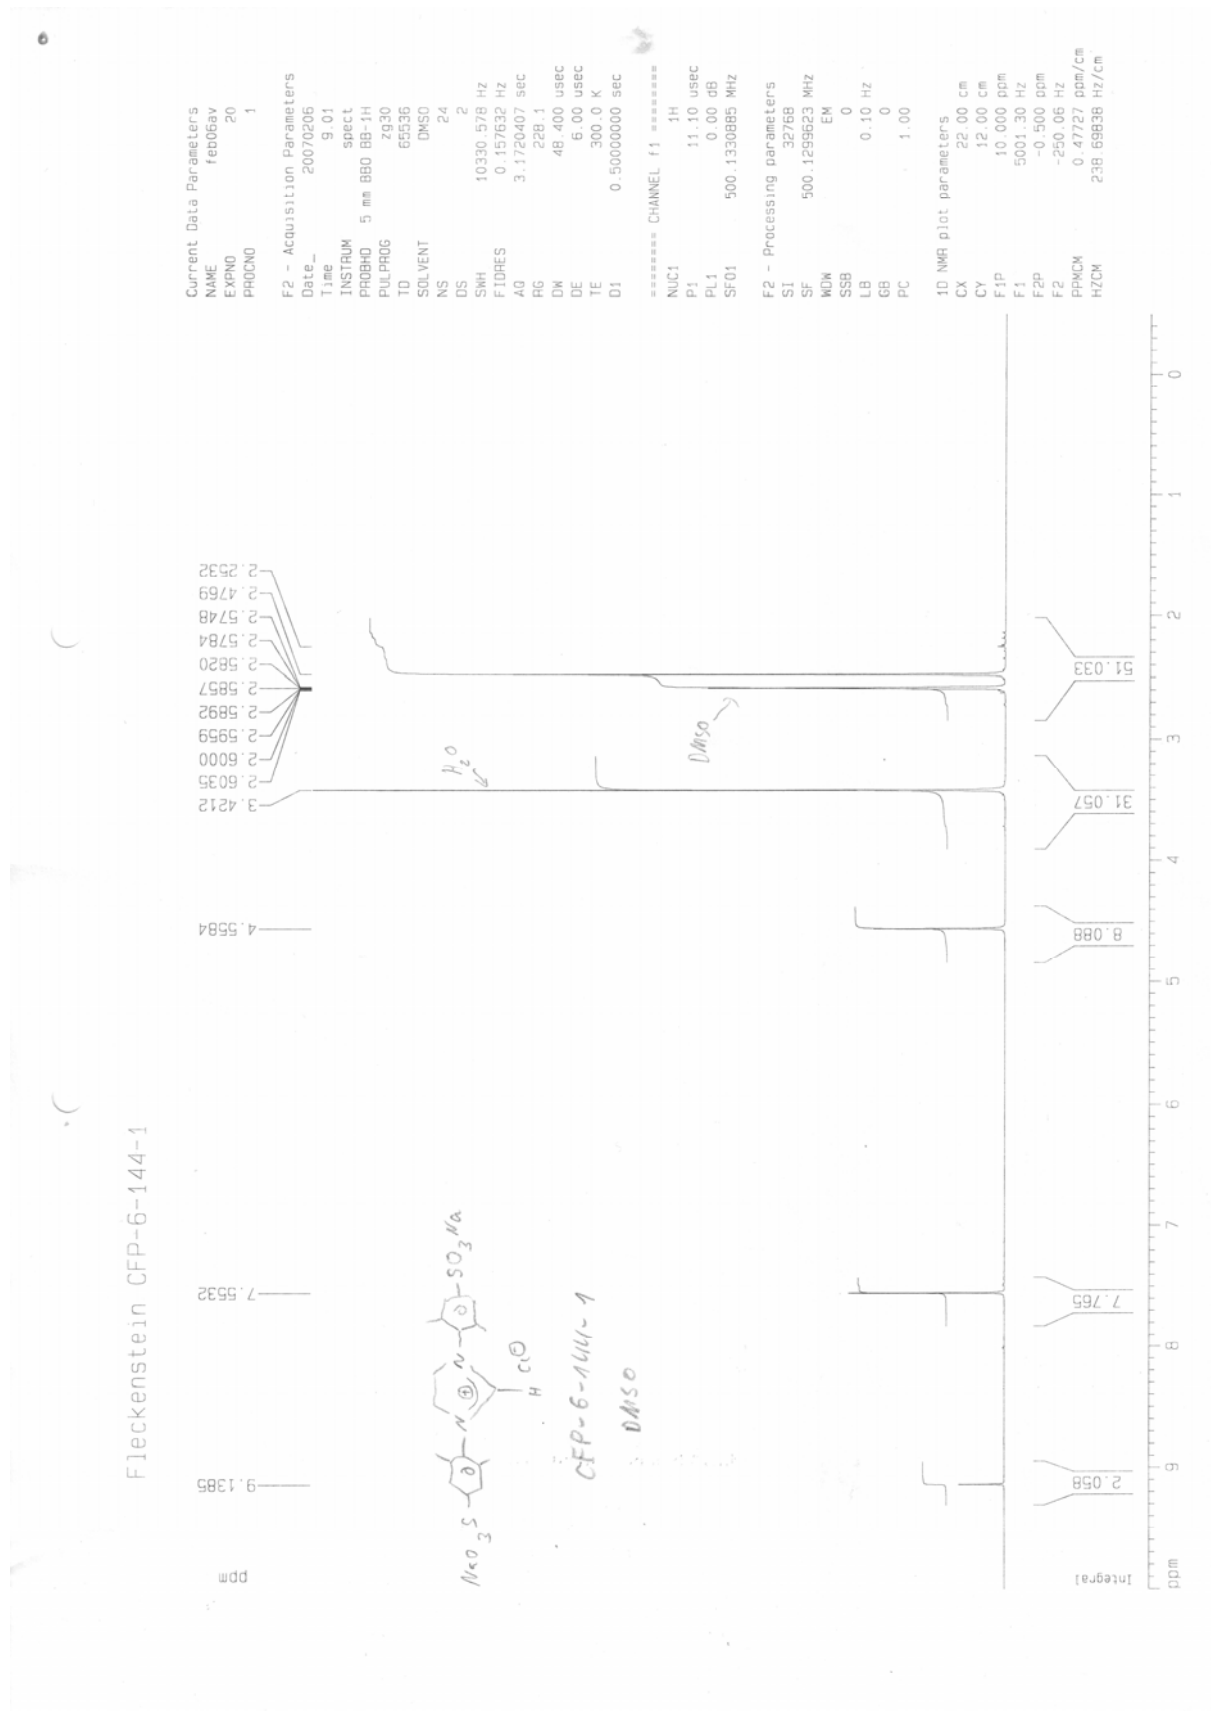

Fleckenstein CFP-6-144-1

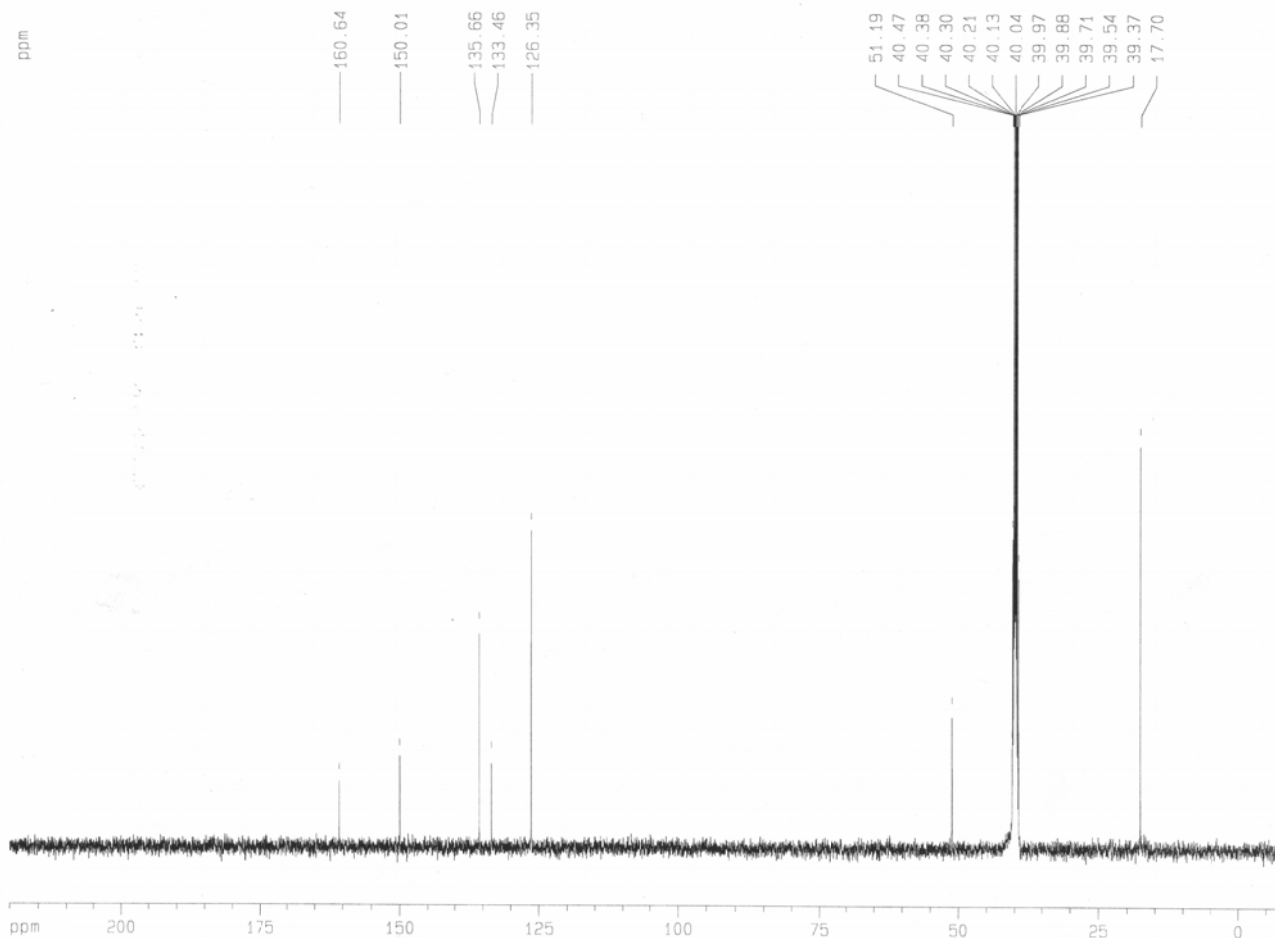

Current Data Parameters  
 NAME feb06av  
 EXPNO 21  
 PROCNO 1

F2 - Acquisition Parameters  
 Date\_ 20070206  
 Time 9.07  
 INSTRUM spect  
 PROBHD 5 mm BBO BB-1H  
 PULPROG zgpg30  
 TD 65536  
 SOLVENT DMSO  
 NS 512  
 DS 4  
 SWH 37593.984 Hz  
 FIDRES 0.573639 Hz  
 AQ 0.8716921 sec  
 RG 7298.2  
 DW 13.300 usec  
 DE 6.00 usec  
 TE 300.0 K  
 D1 0.4000001 sec  
 d11 0.0300000 sec  
 d12 0.0000200 sec

\*\*\*\*\* CHANNEL f1 \*\*\*\*\*  
 NUC1 13C  
 P1 7.40 usec  
 PL1 4.00 dB  
 SF01 125.7703143 MHz

\*\*\*\*\* CHANNEL f2 \*\*\*\*\*  
 CPDPRG2 waltz16  
 NUC2 1H  
 PCPD2 84.00 usec  
 PL2 0.00 dB  
 PL12 19.00 dB  
 PL13 19.00 dB  
 SF02 500.1320005 MHz

F2 - Processing parameters  
 SI 32768  
 SF 125.7578019 MHz  
 WDW EM  
 SSB 0  
 LB 2.00 Hz  
 GB 0  
 PC 1.00

1D NMR plot parameters  
 CX 22.00 cm  
 CY 7.00 cm  
 F1P 220.000 ppm  
 F1 27666.72 Hz  
 F2P -8.000 ppm  
 F2 -1006.06 Hz  
 PPMCM 10.36364 ppm/cm  
 HZCM 1303.30823 Hz/cm



Fleckenstein CFP-6-154-b

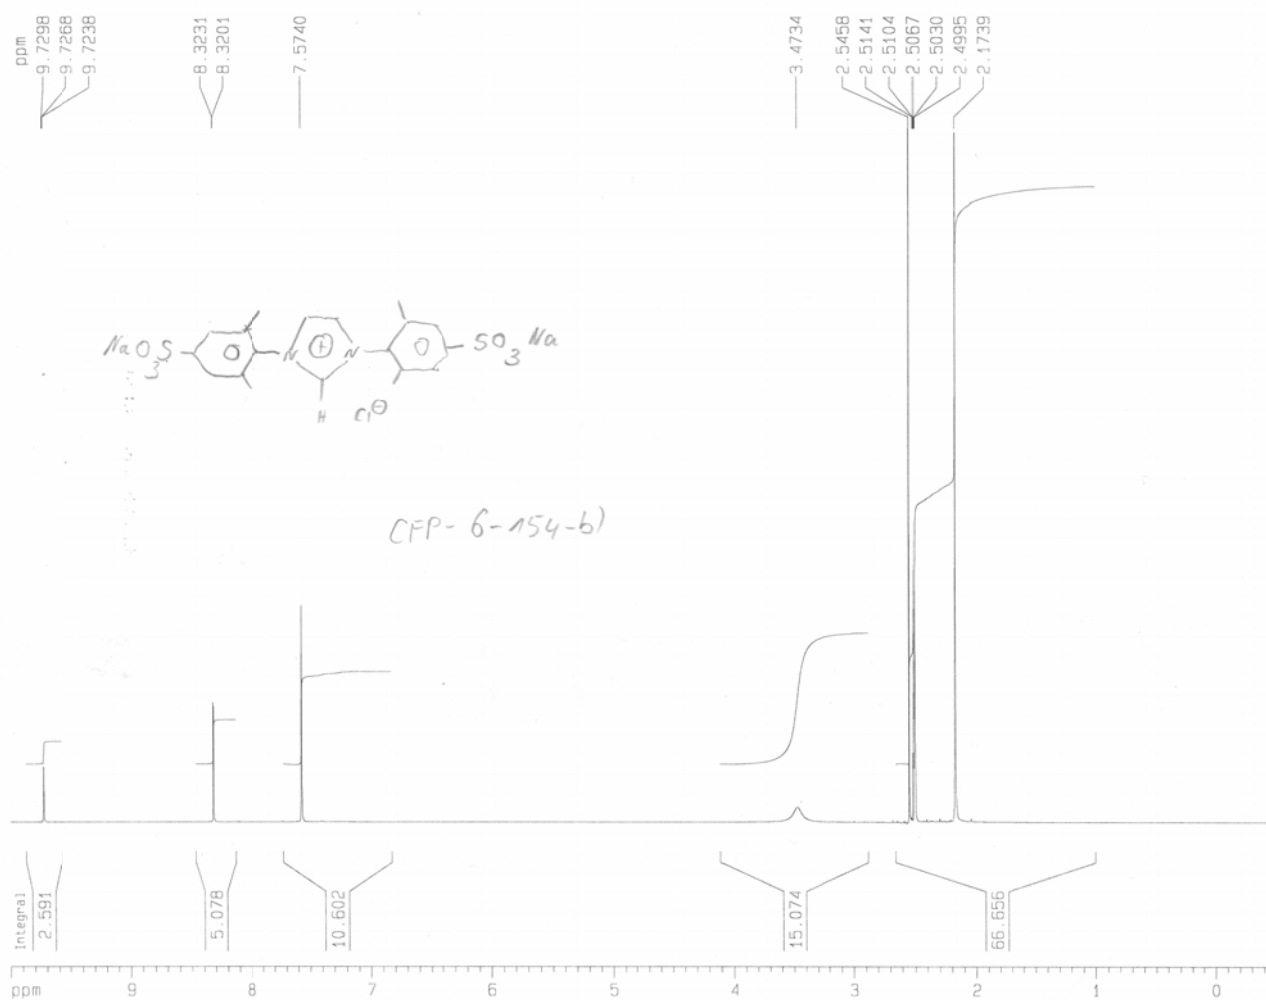

Current Data Parameters  
 NAME feb28av  
 EXPNO 20  
 PROCNO 1

F2 - Acquisition Parameters  
 Date\_ 20070228  
 Time 9.37  
 INSTRUM spect  
 PROBHD 5 mm BBO BB-1H  
 PULPROG zg30  
 TD 65536  
 SOLVENT DMSO  
 NS 24  
 DS 2  
 SWH 10330.578 Hz  
 FIDRES 0.157632 Hz  
 AQ 3.1720407 sec  
 RG 161.3  
 DW 48.400 usec  
 DE 6.00 usec  
 TE 300.0 K  
 D1 0.50000000 sec

===== CHANNEL f1 =====  
 NUC1 1H  
 P1 11.10 usec  
 PL1 0.00 dB  
 SFO1 500.1330885 MHz

F2 - Processing parameters  
 SI 32768  
 SF 500.1300000 MHz  
 WDW EM  
 SSB 0  
 LB 0.10 Hz  
 GB 0  
 PC 1.00

1D NMR plot parameters  
 CX 22.00 cm  
 CY 12.00 cm  
 F1P 10.000 ppm  
 F1 5001.30 Hz  
 F2P -0.500 ppm  
 F2 -250.06 Hz  
 PPMCM 0.47727 ppm/cm  
 HZCM 238.69839 Hz/cm

Fleckenstein CFP-6-154-b

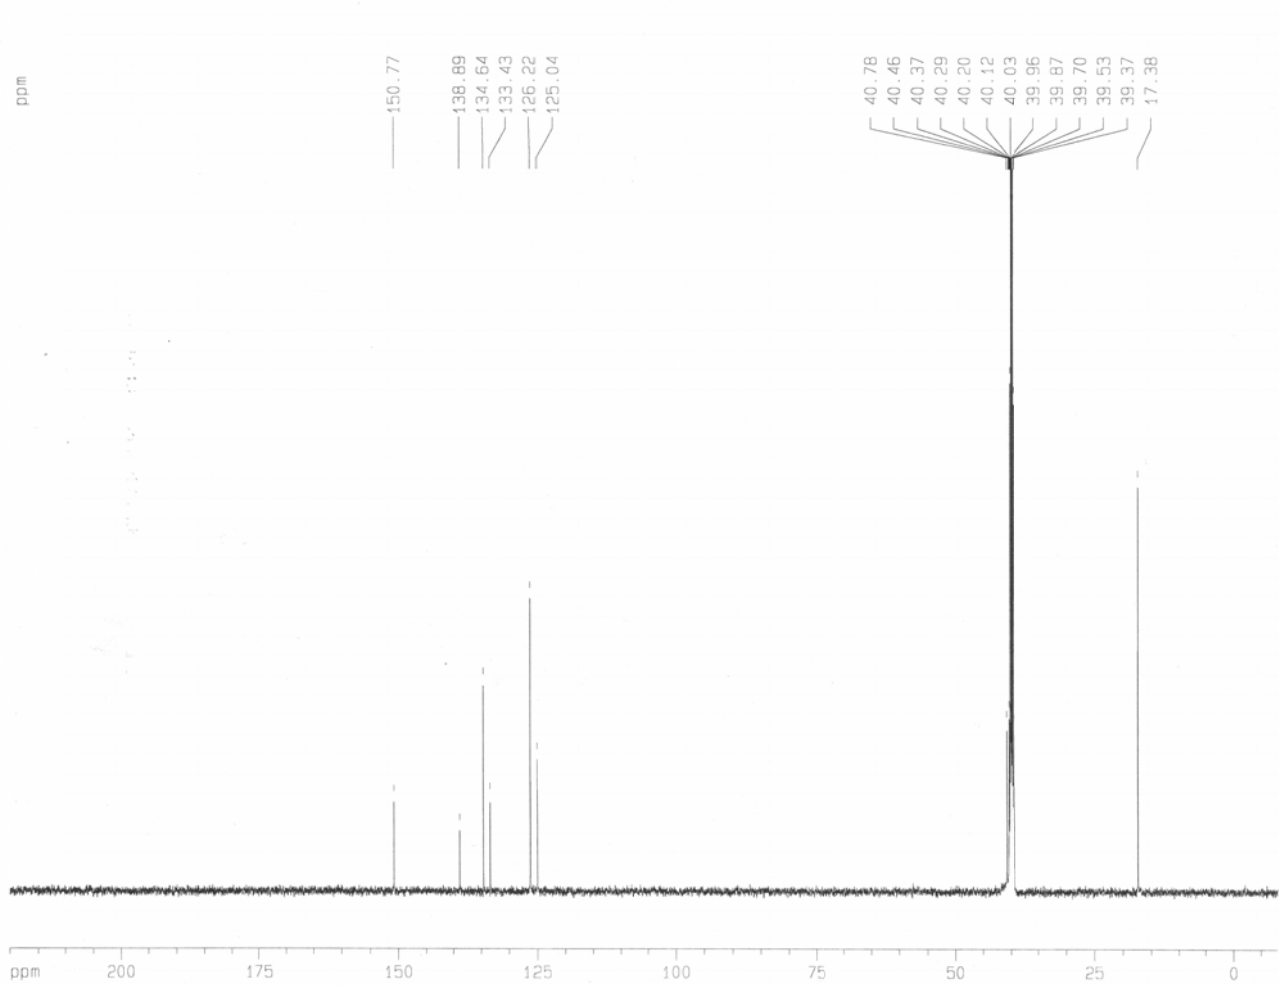

Current Data Parameters  
 NAME feb28av  
 EXPNO 21  
 PROCNO 1

F2 - Acquisition Parameters  
 Date\_ 20070228  
 Time 9.49  
 INSTRUM spect  
 PROBHD 5 mm BBO BB-1H  
 PULPROG zgpg30  
 TD 65536  
 SOLVENT DMSO  
 NS 512  
 DS 4  
 SWH 37593.984 Hz  
 FIDRES 0.573639 Hz  
 AQ 0.8716921 sec  
 RG 8192  
 DK 13.300 usec  
 DE 5.00 usec  
 TE 300.0 K  
 D1 0.4000001 sec  
 d11 0.03000000 sec  
 d12 0.00002000 sec

\*\*\*\*\* CHANNEL f1 \*\*\*\*\*  
 NUC1 13C  
 P1 7.40 usec  
 PL1 4.00 dB  
 SF01 125.7703143 MHz

\*\*\*\*\* CHANNEL f2 \*\*\*\*\*  
 CPDPRG2 waltz16  
 NUC2 1H  
 PCPD2 84.00 usec  
 PL2 0.00 dB  
 PL12 19.00 dB  
 PL13 19.00 dB  
 SF02 500.1320005 MHz

F2 - Processing parameters  
 SI 32768  
 SF 125.7578019 MHz  
 WDW EM  
 SSB 0  
 LB 2.00 Hz  
 GB 0  
 PC 1.00

1D NMR plot parameters  
 CX 22.00 cm  
 CY 7.00 cm  
 F1P 220.000 ppm  
 F1 27666.72 Hz  
 F2P -8.000 ppm  
 F2 -1006.06 Hz  
 PPMCM 10.36364 ppm/cm  
 HZCM 1303.30823 Hz/cm

Fleckenstein CFP-6-137-c

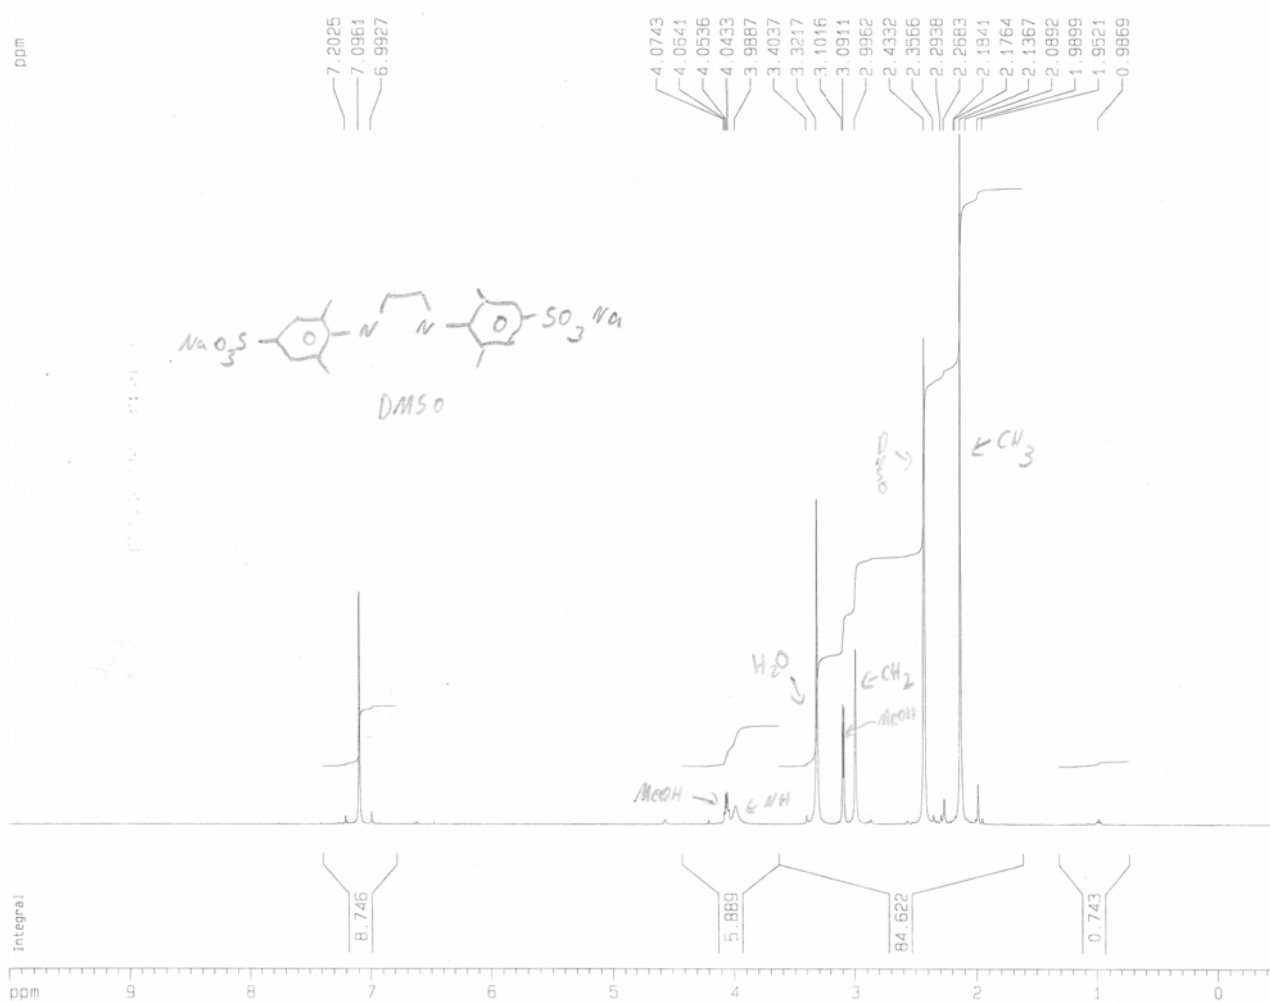

Current Data Parameters  
 NAME jan29av  
 EXPNO 20  
 PROCNO 1

F2 - Acquisition Parameters  
 Date\_ 20070129  
 Time 9.56  
 INSTRUM spect  
 PROBHD 5 mm BBO BB-1H  
 PULPROG zg30  
 TD 65536  
 SOLVENT DMSO  
 NS 24  
 DS 2  
 SMH 10330.578 Hz  
 FIDRES 0.157632 Hz  
 AQ 3.1720407 sec  
 RG 203.2  
 DW 48.400 usec  
 DE 6.00 usec  
 TE 300.0 K  
 D1 0.50000000 sec

\*\*\*\*\* CHANNEL f1 \*\*\*\*\*  
 NUC1 1H  
 P1 11.10 usec  
 PL1 0.00 dB  
 SFO1 500.1330885 MHz

F2 - Processing parameters  
 SI 32768  
 SF 500.1300351 MHz  
 WDW EM  
 SSB 0  
 LB 0.10 Hz  
 GB 0  
 PC 1.00

1D NMR plot parameters  
 CX 22.00 cm  
 CY 12.00 cm  
 F1P 10.000 ppm  
 F1 5001.30 Hz  
 F2P -0.500 ppm  
 F2 -250.06 Hz  
 PPMCM 0.47727 ppm/cm  
 HZCM 238.69841 Hz/cm

Fleckenstein CFP-6-137-c

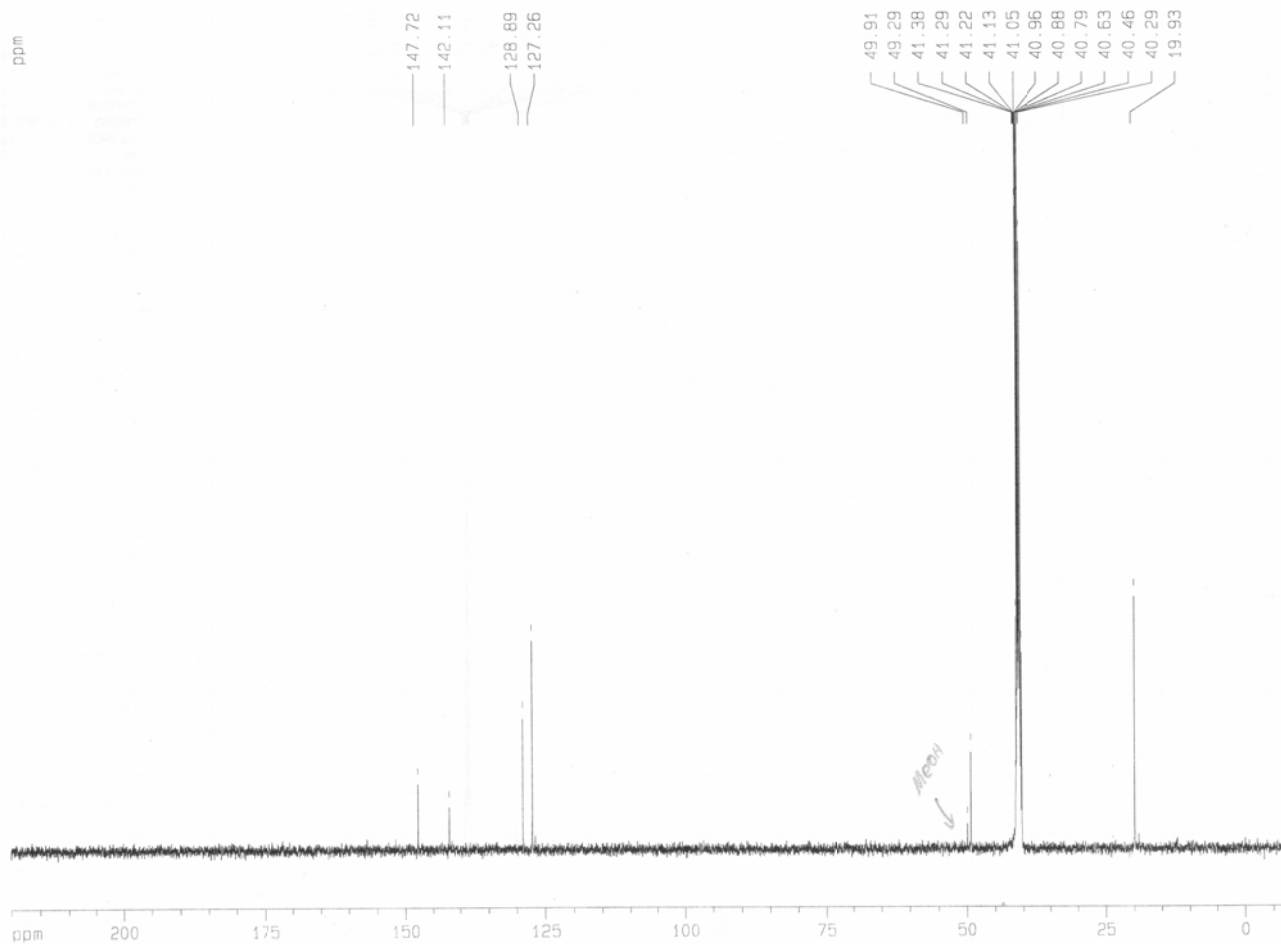

Current Data Parameters  
 NAME jan29av  
 EXPNO 21  
 PROCNO 1

F2 - Acquisition Parameters  
 Date\_ 20070129  
 Time 10.00  
 INSTRUM spect  
 PROSHO 5 mm BBO BB-1H  
 PULPROG zgpg30  
 TD 65536  
 SOLVENT DMSO  
 NS 401  
 DS 4  
 SWH 37593.984 Hz  
 FIDRES 0.573639 Hz  
 AQ 0.8716921 sec  
 RG 3251  
 DW 13.300 usec  
 DE 6.00 usec  
 TE 300.0 K  
 d1 0.4000001 sec  
 d11 0.03000000 sec  
 d12 0.0002000 sec

----- CHANNEL f1 -----  
 NUC1 13C  
 P1 7.40 usec  
 PL1 4.00 dB  
 SF01 125.7703143 MHz

----- CHANNEL f2 -----  
 CPDPRG2 waitz16  
 NUC2 1H  
 PCPD2 84.00 usec  
 PL2 0.00 dB  
 PL12 19.00 dB  
 PL13 19.00 dB  
 SF02 500.1320005 MHz

F2 - Processing parameters  
 SI 32768  
 SF 125.7576807 MHz  
 WDM EM  
 SSB 0  
 LB 2.00 Hz  
 GB 0  
 PC 1.00

1D NMR plot parameters  
 CX 22.00 cm  
 CY 25.00 cm  
 F1P 220.000 ppm  
 F1 27666.69 Hz  
 F2P -8.000 ppm  
 F2 -1006.06 Hz  
 PPMCM 10.36364 ppm/cm  
 HZCM 1303.30688 Hz/cm

Fleckenstein CFP-6-109-c

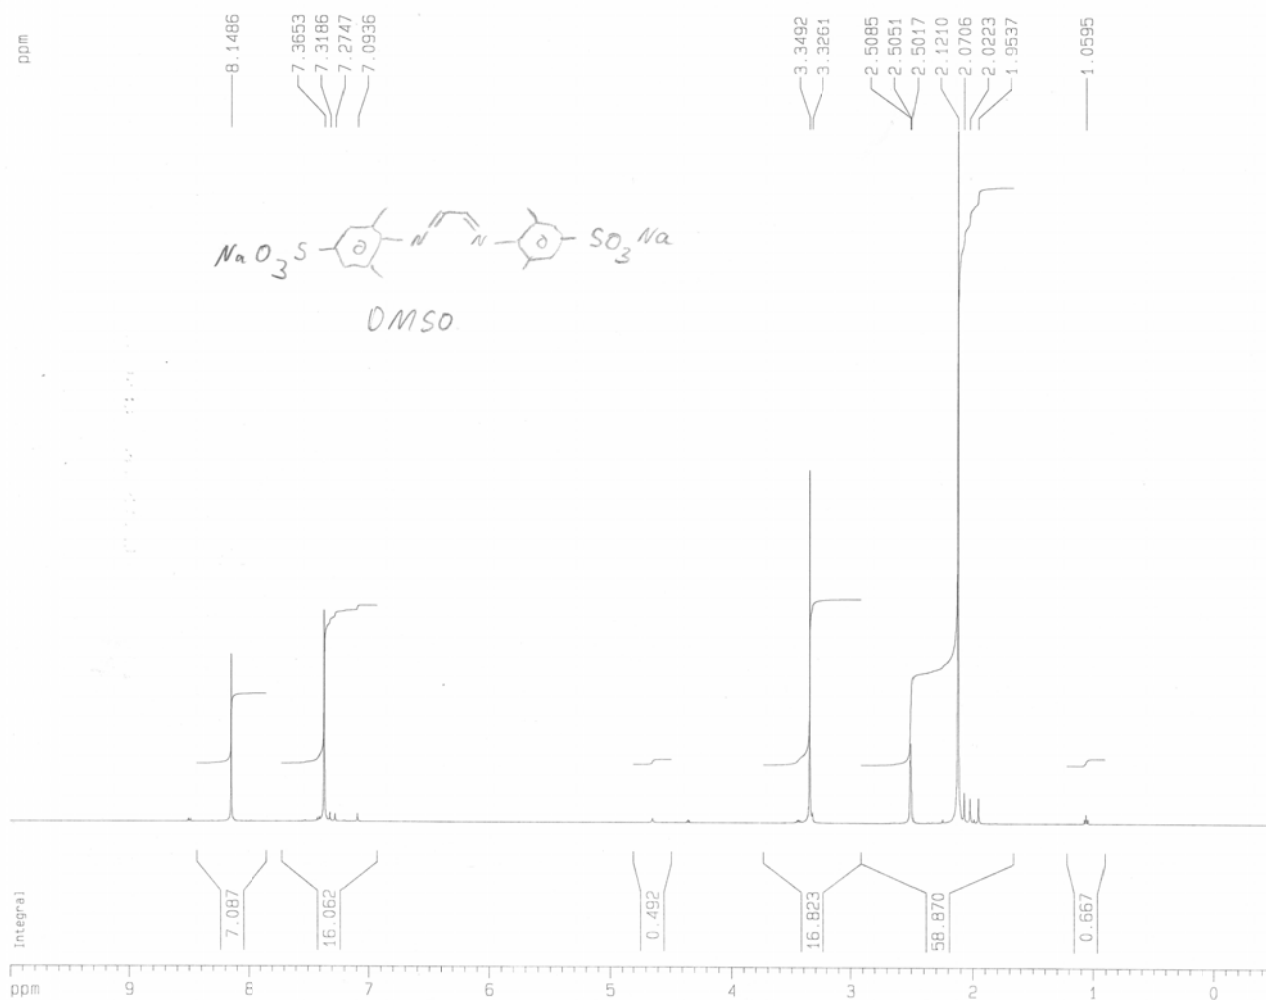

Current Data Parameters  
NAME dez07av  
EXPNO 20  
PROCNO 1

F2 - Acquisition Parameters  
Date\_ 20061207  
Time 13.19  
INSTRUM spect  
PROBHD 5 mm BBO BB-1H  
PULPROG zg30  
TD 65536  
SOLVENT DMSO  
NS 24  
DS 2  
SWH 10330.578 Hz  
FIDRES 0.157632 Hz  
AQ 3.1720407 sec  
RG 181  
DW 48.400 usec  
DE 6.00 usec  
TE 300.0 K  
D1 0.50000000 sec

===== CHANNEL f1 =====  
NUC1 1H  
P1 11.10 usec  
PL1 0.00 dB  
SF01 500.1330885 MHz

F2 - Processing parameters  
SI 32768  
SF 500.1300000 MHz  
WDW EM  
SSB 0  
LB 0.10 Hz  
GB 0  
PC 1.00

1D NMR plot parameters  
CX 22.00 cm  
CY 12.00 cm  
F1P 10.000 ppm  
F1 5001.30 Hz  
F2P -0.500 ppm  
F2 -250.06 Hz  
PPMCM 0.47727 ppm/cm  
HZCM 238.69839 Hz/cm

Fleckenstein CFP-6-109-c

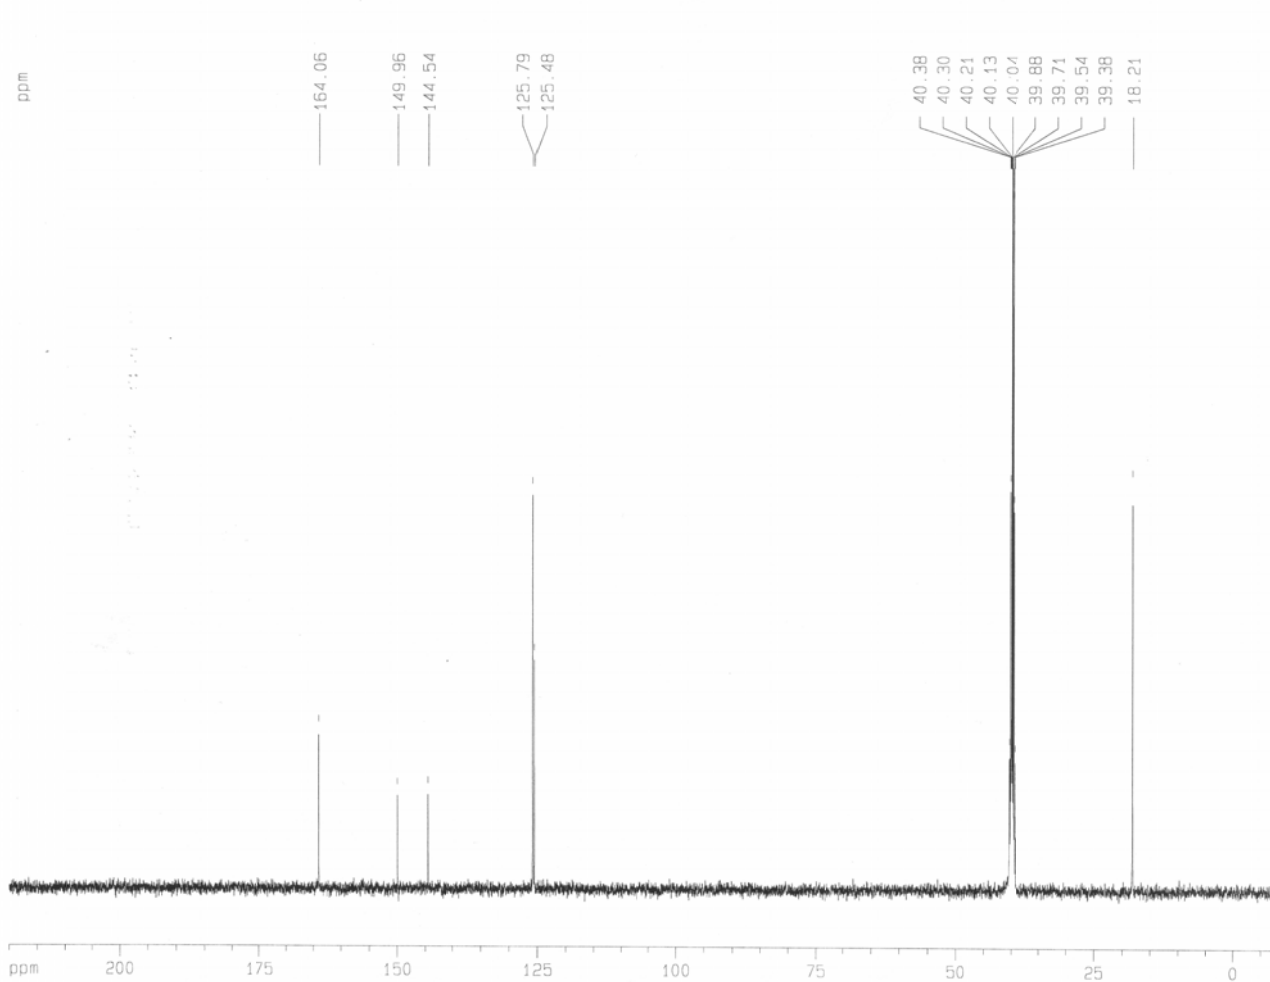

Current Data Parameters  
 NAME dez07av  
 EXPNO 21  
 PROCNO 1

F2 - Acquisition Parameters  
 Date\_ 20061207  
 Time 13.23  
 INSTRUM spect  
 PROBHD 5 mm BBO BB-1H  
 PULPROG zgpg30  
 TD 65536  
 SOLVENT DMSO  
 NS 215  
 DS 4  
 SWH 37593.984 Hz  
 FIDRES 0.573639 Hz  
 AQ 0.8716921 sec  
 RG 5160.6  
 DW 13.300 usec  
 DE 6.00 usec  
 TE 300.0 K  
 D1 0.4000001 sec  
 d11 0.0300000 sec  
 d12 0.0000200 sec

\*\*\*\*\* CHANNEL f1 \*\*\*\*\*  
 NUC1 13C  
 P1 7.40 usec  
 PL1 4.00 dB  
 SF01 125.7703143 MHz

\*\*\*\*\* CHANNEL f2 \*\*\*\*\*  
 CPDPRG2 waltz16  
 NUC2 1H  
 PCPD2 84.00 usec  
 PL2 0.00 dB  
 PL12 19.00 dB  
 PL13 19.00 dB  
 SF02 500.1320005 MHz

F2 - Processing parameters  
 SI 32768  
 SF 125.7578019 MHz  
 WDW EM  
 SSB 0  
 LB 2.00 Hz  
 GB 0  
 PC 1.00

1D NMR plot parameters  
 CX 22.00 cm  
 CY 7.00 cm  
 F1P 220.000 ppm  
 F1 27666.72 Hz  
 F2P -8.000 ppm  
 F2 -1006.06 Hz  
 PPMCM 10.36364 ppm/cm  
 HZCM 1303.30823 Hz/cm

Fleckenstein CFP-6-147-b

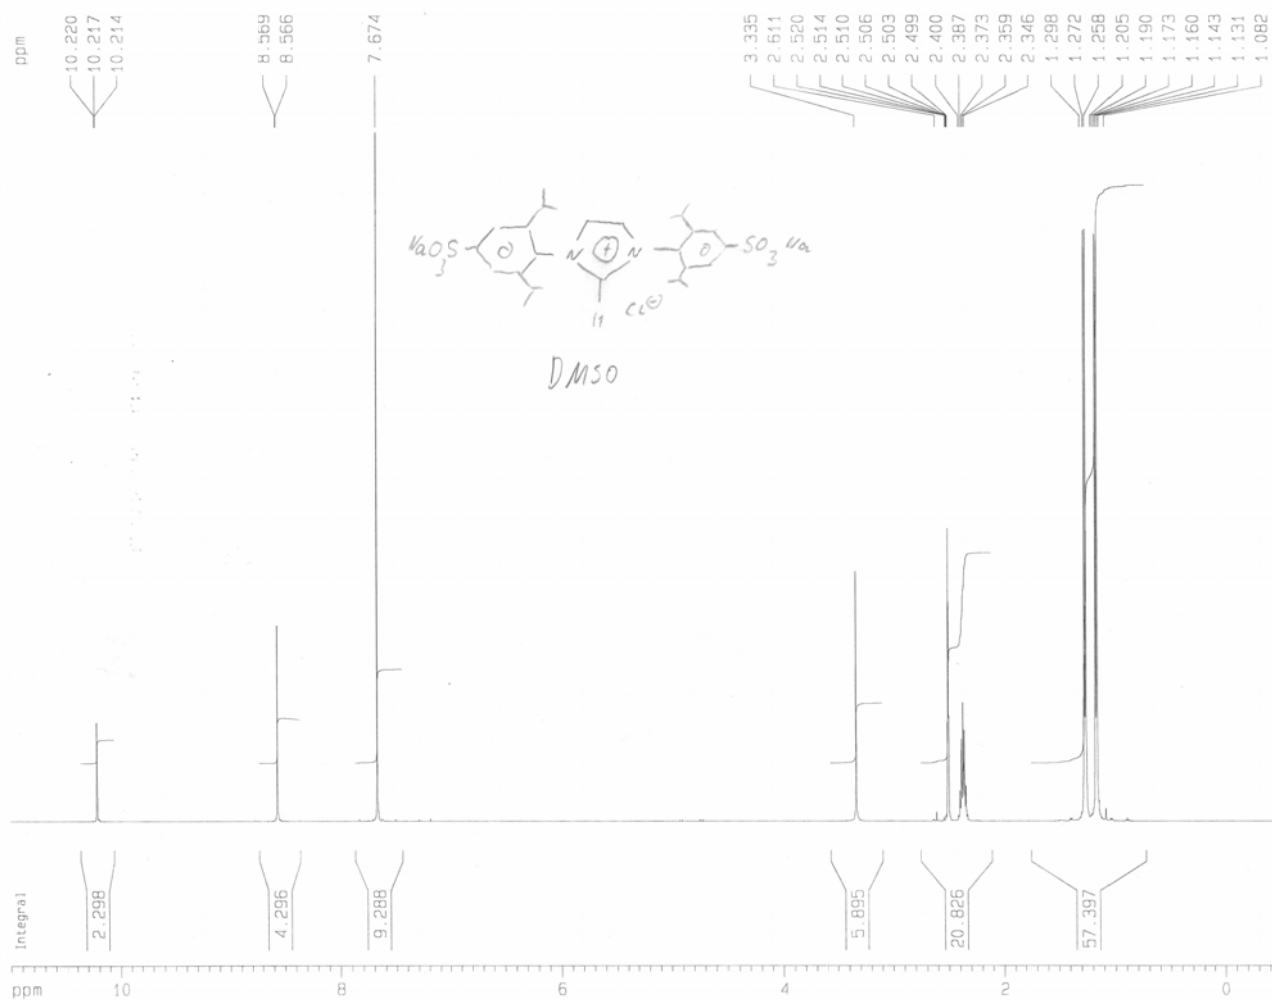

Current Data Parameters  
 NAME feb16av  
 EXPNO 10  
 PROCNO 1

F2 - Acquisition Parameters  
 Date\_ 20070216  
 Time 8.34  
 INSTRUM spect  
 PROBHD 5 mm BBO BB-1H  
 PULPROG zg30  
 TD 65536  
 SOLVENT DMSO  
 NS 24  
 DS 2  
 SWH 10330.578 Hz  
 FIDRES 0.157632 Hz  
 AQ 3.1720407 sec  
 RG 90.5  
 DW 48.400 usec  
 DE 6.00 usec  
 TE 300.0 K  
 D1 0.50000000 sec

===== CHANNEL f1 =====  
 NUC1 1H  
 P1 11.10 usec  
 PL1 0.00 dB  
 SFO1 500.1330885 MHz

F2 - Processing parameters  
 SI 32768  
 SF 500.1300000 MHz  
 WDW EM  
 SSB 0  
 LB 0.10 Hz  
 GB 0  
 PC 1.00

1D NMR plot parameters  
 CX 22.00 cm  
 CY 12.00 cm  
 F1P 11.000 ppm  
 F1 5501.43 Hz  
 F2P -0.500 ppm  
 F2 -250.06 Hz  
 PPMCM 0.52273 ppm/cm  
 HZCM 261.43158 Hz/cm

Fleckenstein CFP-6-147-b

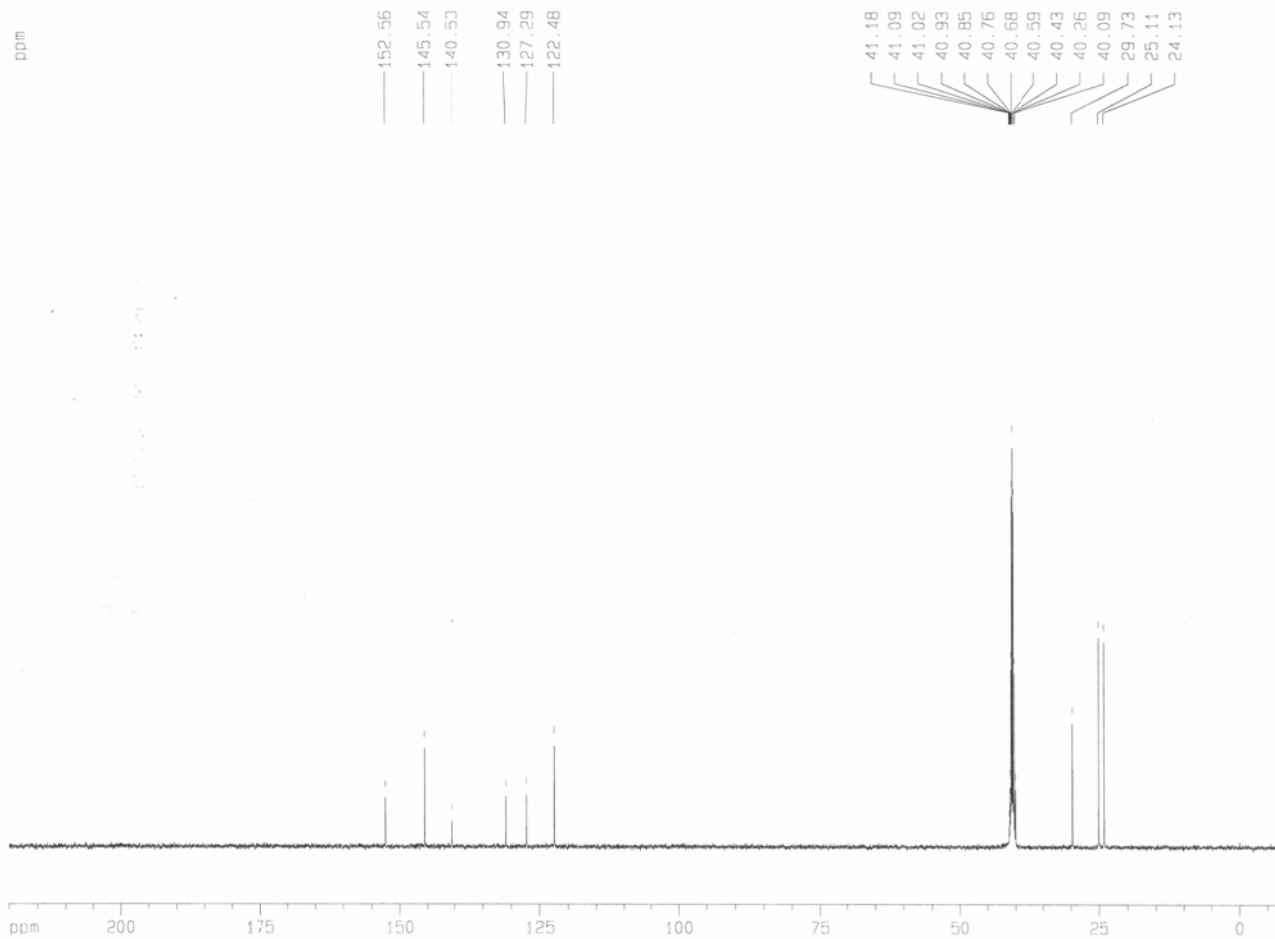

Current Data Parameters  
 NAME feb16av  
 EXPNO 11  
 PROCNO 1

F2 - Acquisition Parameters  
 Date\_ 20070216  
 Time 8.36  
 INSTRUM spect  
 PROBHD 5 mm BBO BB-1H  
 PULPROG zgpg30  
 TD 65536  
 SOLVENT DMSO  
 NS 293  
 DS 4  
 SWH 37593.984 Hz  
 FIDRES 0.573639 Hz  
 AQ 0.8716921 sec  
 RG 6502  
 DW 13.300 usec  
 DE 6.00 usec  
 TE 300.0 K  
 D1 0.40000001 sec  
 d11 0.03000000 sec  
 d12 0.00002000 sec

----- CHANNEL f1 -----  
 NUC1 13C  
 P1 7.40 usec  
 PL1 4.00 dB  
 SF01 125.7703143 MHz

----- CHANNEL f2 -----  
 CPDPRG2 waltz16  
 NUC2 1H  
 PCPD2 84.00 usec  
 PL2 0.00 dB  
 PL12 19.00 dB  
 PL13 19.00 dB  
 SF02 500.1320005 MHz

F2 - Processing parameters  
 SI 32768  
 SF 125.7577132 MHz  
 WDW EM  
 SSB 0  
 LB 2.00 Hz  
 GB 0  
 PC 1.00

1D NMR plot parameters  
 CX 22.00 cm  
 CY 7.00 cm  
 F1P 220.000 ppm  
 F1 27666.70 Hz  
 F2P -8.000 ppm  
 F2 -1006.06 Hz  
 PPMCM 10.36364 ppm/cm  
 HZCM 1303.30725 Hz/cm



Fleckenstein CFP-6-124-b

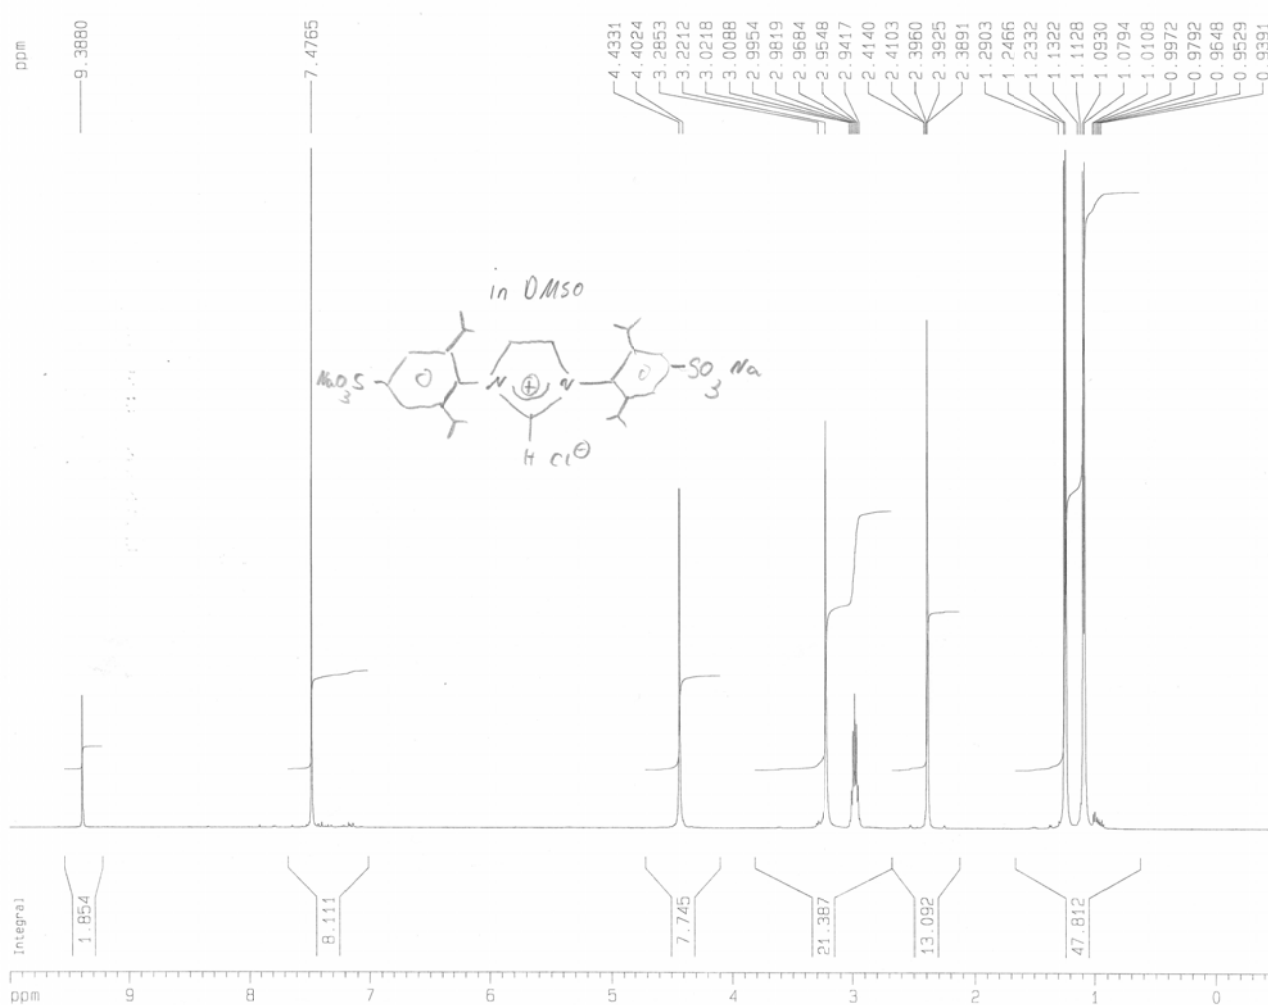

Current Data Parameters  
 NAME jan15av  
 EXPNO 70  
 PROCNO 1

F2 - Acquisition Parameters  
 Date\_ 20070115  
 Time 15.26  
 INSTRUM spect  
 PROBHD 5 mm BBO BB-1H  
 PULPROG zg30  
 TD 65536  
 SOLVENT DMSO  
 NS 24  
 DS 2  
 SWH 10330.578 Hz  
 FIDRES 0.157632 Hz  
 AQ 3.1720407 sec  
 RG 128  
 DW 48.400 usec  
 DE 6.00 usec  
 TE 300.0 K  
 D1 0.50000000 sec

\*\*\*\*\* CHANNEL f1 \*\*\*\*\*  
 NUC1 1H  
 P1 11.10 usec  
 PL1 0.00 dB  
 SFO1 500.1330885 MHz

F2 - Processing parameters  
 S1 32768  
 SF 500.1300569 MHz  
 WDW EM  
 SSB 0  
 LB 0.10 Hz  
 GB 0  
 PC 1.00

1D NMR plot parameters  
 CX 22.00 cm  
 CY 12.00 cm  
 F1P 10.000 ppm  
 F1 5001.30 Hz  
 F2P -0.500 ppm  
 F2 -250.06 Hz  
 PPMCM 0.47727 ppm/cm  
 HZCM 238.69843 Hz/cm

Fleckenstein CFP-6-124-b

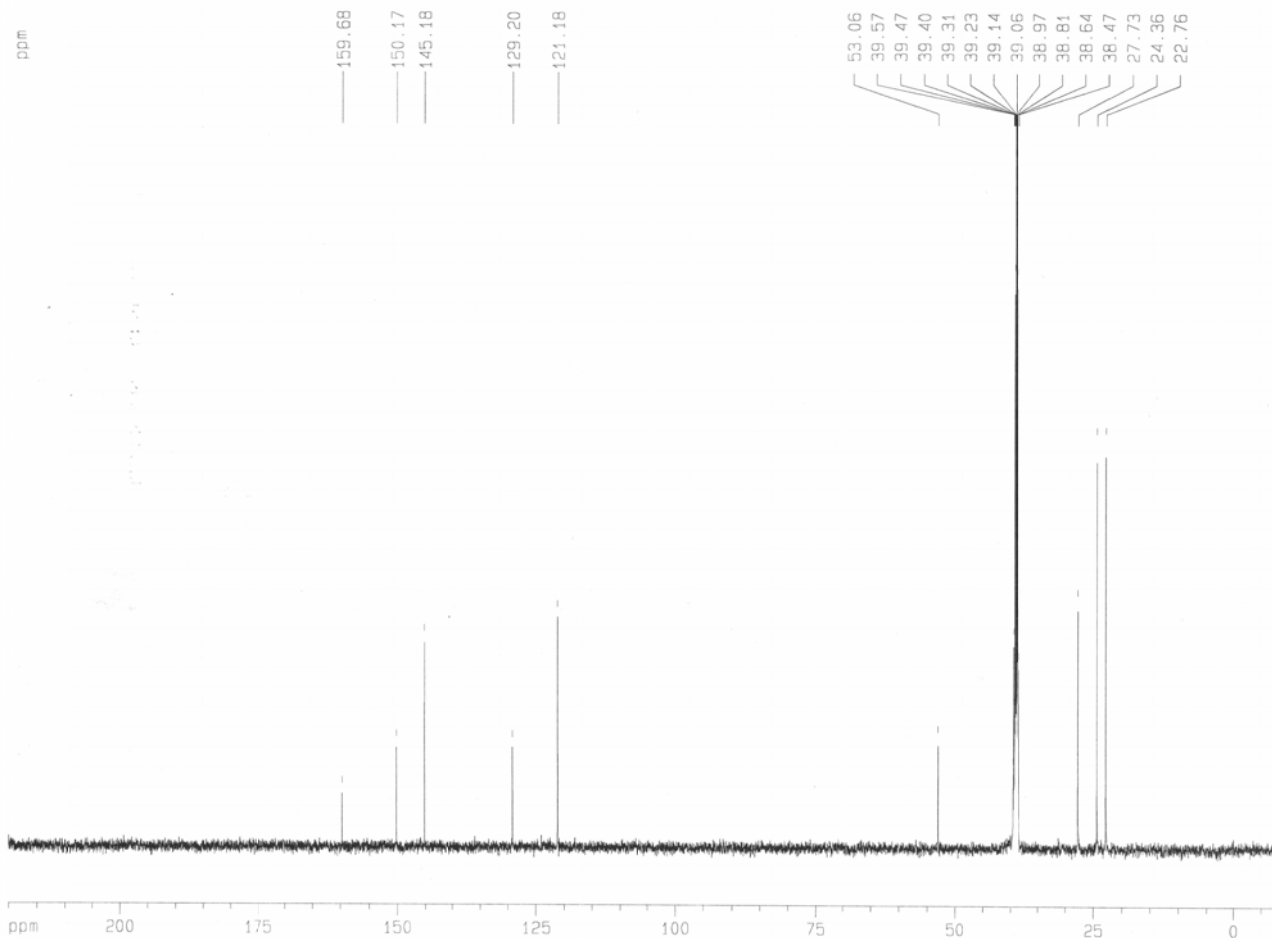

Current Data Parameters  
 NAME jan15av  
 EXPNO 71  
 PROCNO 1

F2 - Acquisition Parameters  
 Date\_ 20070115  
 Time 15.38  
 INSTRUM spect  
 PROBHD 5 mm BBO BB-1H  
 PULPROG zgpg30  
 TD 65536  
 SOLVENT DMSO  
 NS 512  
 DS 4  
 SWH 37593.984 Hz  
 FIDRES 0.573639 Hz  
 AQ 0.8716921 sec  
 RG 6502  
 DW 13.300 usec  
 DE 6.00 usec  
 TE 300.0 K  
 D1 0.4000001 sec  
 d11 0.03000000 sec  
 d12 0.00002000 sec

\*\*\*\*\* CHANNEL f1 \*\*\*\*\*  
 NUC1 13C  
 P1 7.40 usec  
 PL1 4.00 dB  
 SFO1 125.7703143 MHz

\*\*\*\*\* CHANNEL f2 \*\*\*\*\*  
 CPDPRG2 waltz16  
 NUC2 1H  
 PCPD2 84.00 usec  
 PL2 0.00 dB  
 PL12 19.00 dB  
 PL13 19.00 dB  
 SFO2 500.1320005 MHz

F2 - Processing parameters  
 SI 32768  
 SF 125.7579171 MHz  
 WDW EM  
 SSB 0  
 LB 2.00 Hz  
 GB 0  
 PC 1.00

1D NMR plot parameters  
 CX 22.00 cm  
 CY 7.00 cm  
 F1P 220.000 ppm  
 F1 27666.74 Hz  
 F2P -8.000 ppm  
 F2 -1006.06 Hz  
 PPMCM 10.36364 ppm/cm  
 HZCM 1303.30933 Hz/cm

Fleckenstein CFP-6-102-b

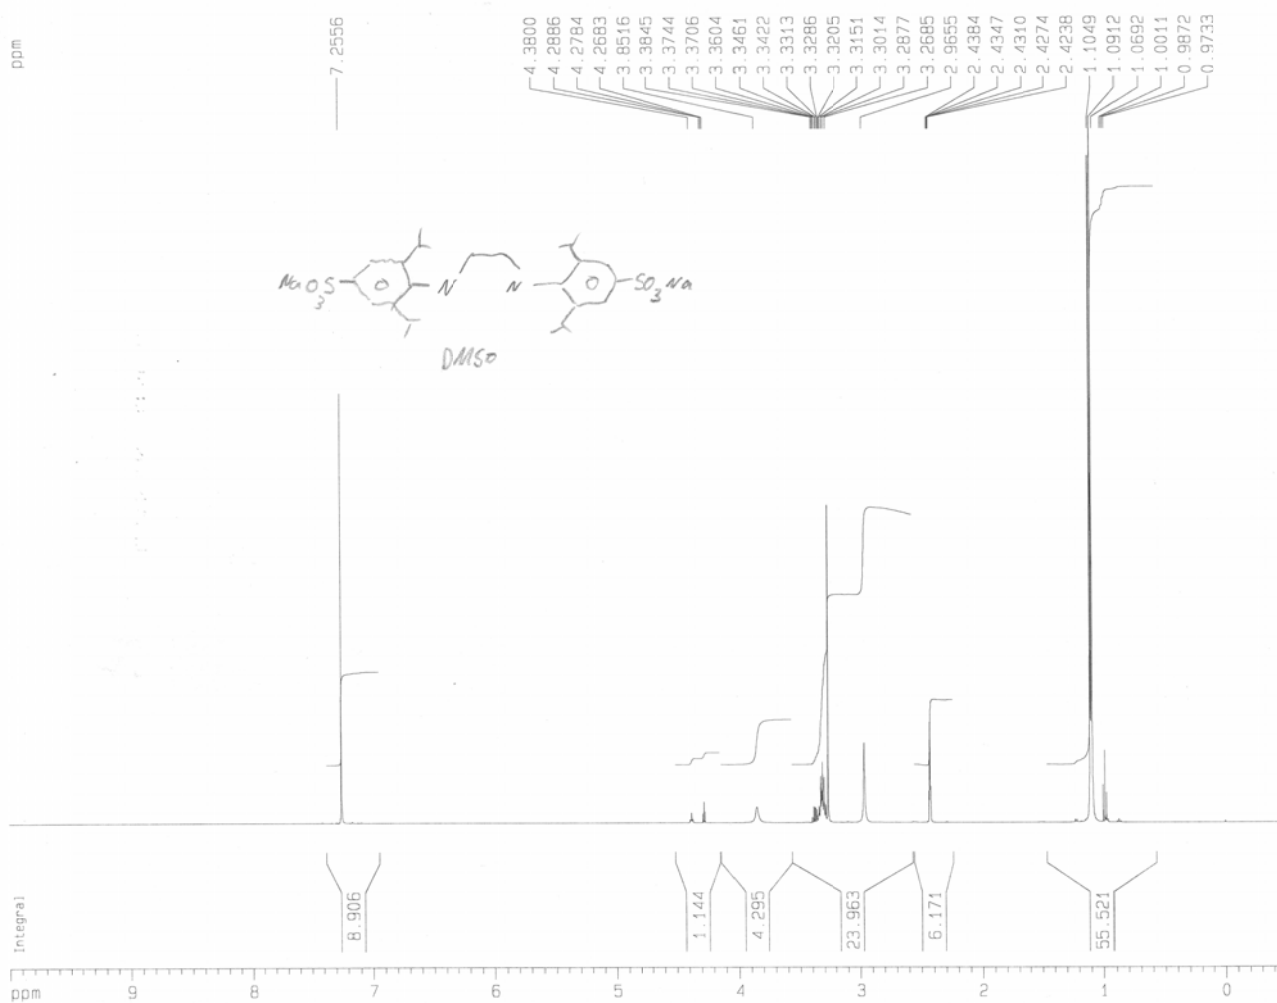

Current Data Parameters  
 NAME nov24av  
 EXPNO 30  
 PROCNO 1

F2 - Acquisition Parameters  
 Date\_ 20061124  
 Time 14.09  
 INSTRUM spect  
 PROBHD 5 mm BBO BB-1H  
 PULPROG zg30  
 TD 65536  
 SOLVENT DMSO  
 NS 32  
 DS 2  
 SWH 10330.578 Hz  
 FIDRES 0.157632 Hz  
 AQ 3.1720407 sec  
 RG 90.5  
 DW 48.400 usec  
 DE 6.00 usec  
 TE 300.0 K  
 D1 0.50000000 sec

===== CHANNEL f1 =====  
 NUC1 1H  
 P1 11.10 usec  
 PL1 0.00 dB  
 SFO1 500.1330885 MHz

F2 - Processing parameters  
 SI 32768  
 SF 500.1300379 MHz  
 WDW EM  
 SSB 0  
 LB 0.10 Hz  
 GB 0  
 PC 1.00

1D NMR plot parameters  
 CX 22.00 cm  
 CY 12.00 cm  
 F1P 10.000 ppm  
 F1 5001.30 Hz  
 F2P -0.500 ppm  
 F2 -250.06 Hz  
 PPMCM 0.47727 ppm/cm  
 HZCM 238.69841 Hz/cm

Fleckenstein CFP-6-102-b

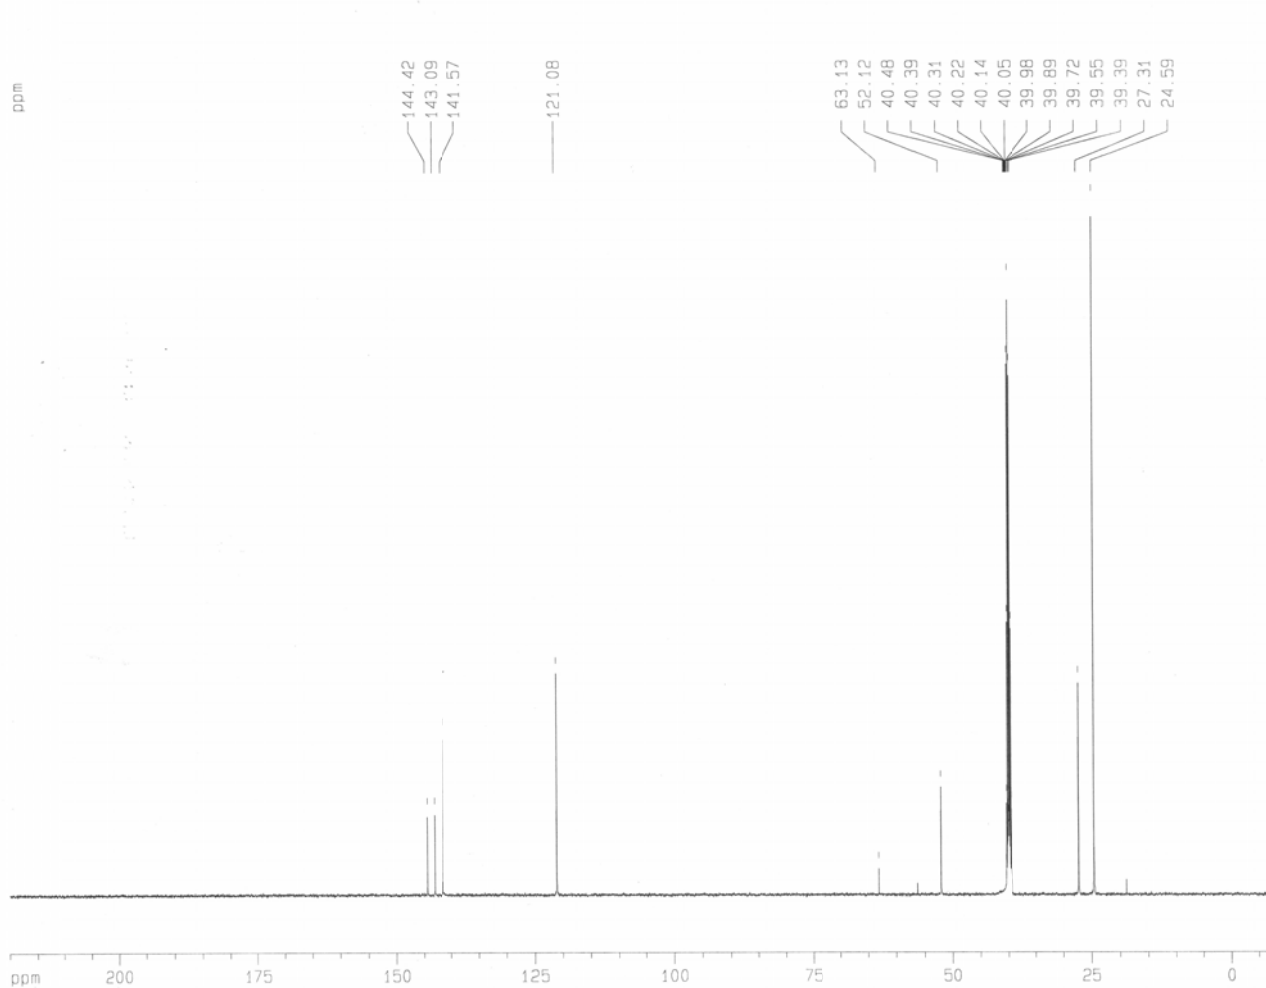

Current Data Parameters  
NAME nov24av  
EXPNO 31  
PROCNO 1

F2 - Acquisition Parameters  
Date\_ 20061124  
Time 14.14  
INSTRUM spect  
PROBHD 5 mm BBO BB-1H  
PULPROG zgpg30  
TD 65536  
SOLVENT DMSO  
NS 2000  
DS 4  
SWH 37593.984 Hz  
FIDRES 0.573639 Hz  
AQ 0.8716921 sec  
RG 5160.6  
DW 13.300 usec  
DE 6.00 usec  
TE 300.0 K  
D1 0.40000001 sec  
d11 0.03000000 sec  
d12 0.00002000 sec

----- CHANNEL f1 -----  
NUC1 13C  
P1 7.40 usec  
PL1 4.00 dB  
SF01 125.7703143 MHz

----- CHANNEL f2 -----  
CPDPRG2 waltz16  
NUC2 1H  
PCPD2 84.00 usec  
PL2 0.00 dB  
PL12 19.00 dB  
PL13 19.00 dB  
SF02 500.1320005 MHz

F2 - Processing parameters  
SI 32768  
SF 125.7578019 MHz  
WDW EM  
SSB 0  
LB 2.00 Hz  
GB 0  
PC 1.00

1D NMR plot parameters  
CX 22.00 cm  
CY 12.00 cm  
F1P 220.000 ppm  
F1 27666.72 Hz  
F2P -8.000 ppm  
F2 -1006.06 Hz  
PPMCM 10.36364 ppm/cm  
HZCM 1303.30823 Hz/cm

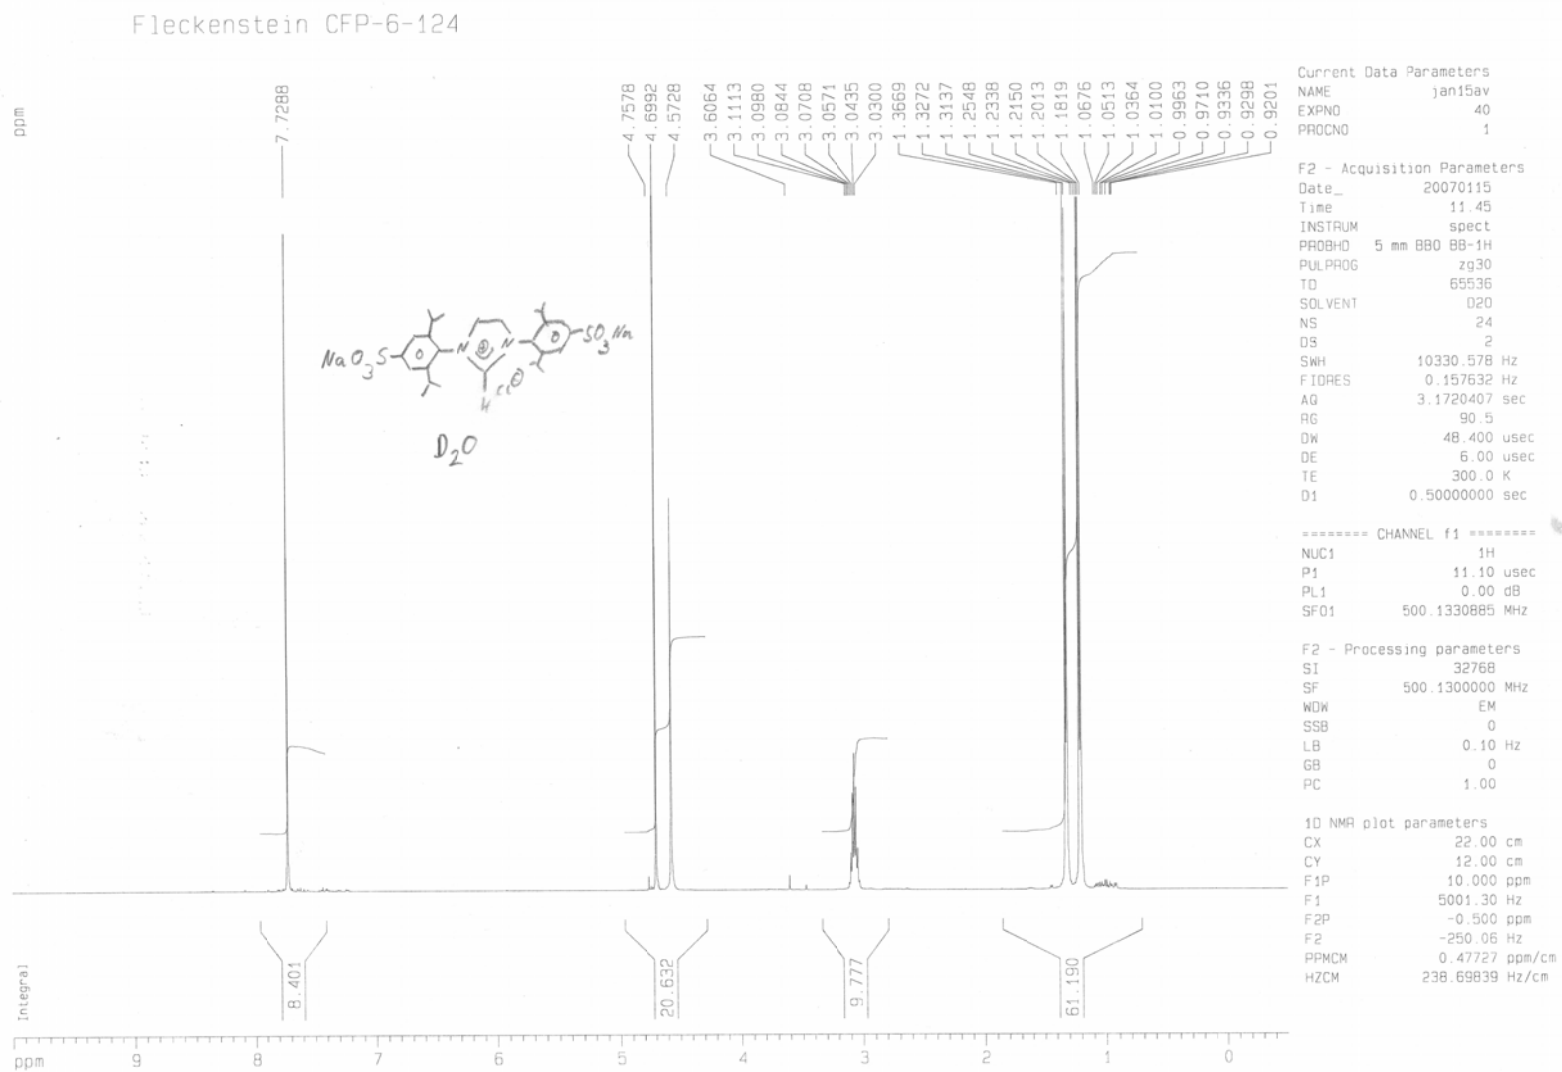

Fleckenstein CFP-6-124

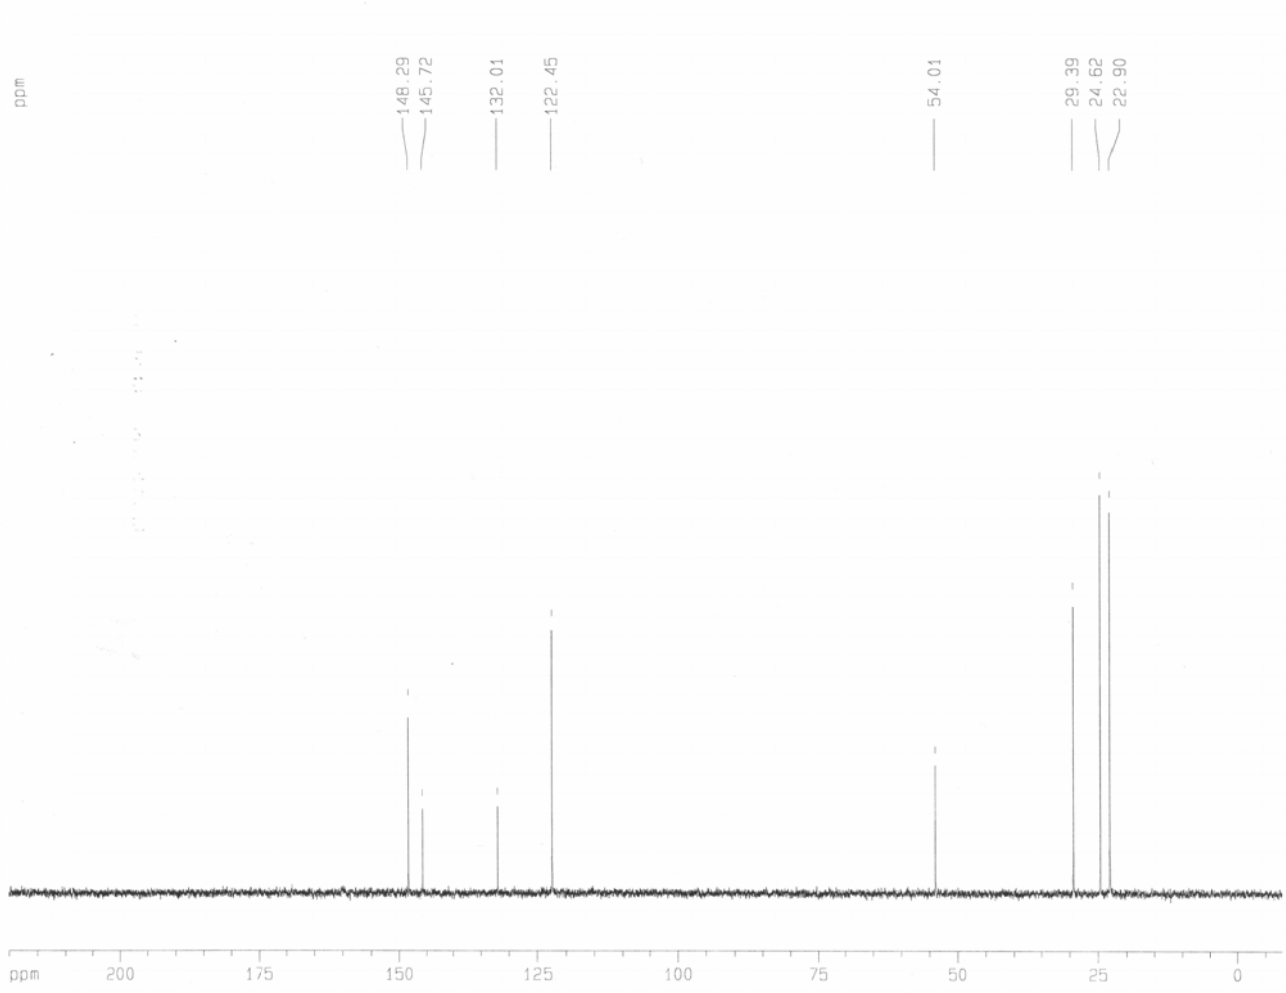

```

Current Data Parameters
NAME          jan15av
EXPNO         41
PROCNO        1

F2 - Acquisition Parameters
Date_         20070115
Time          11.49
INSTRUM       spect
PROBHD        5 mm BBO BB-1H
PULPROG       zgpg30
TD            65536
SOLVENT       D2O
NS            512
DS            4
SWH           37593.984 Hz
FIDRES        0.573639 Hz
AQ            0.8716921 sec
RG            5792.6
DW            13.300 usec
DE            6.00 usec
TE            300.0 K
D1            0.4000001 sec
d11           0.03000000 sec
d12           0.00002000 sec

***** CHANNEL f1 *****
NUC1          13C
P1            7.40 usec
PL1           4.00 dB
SF01          125.7703143 MHz

***** CHANNEL f2 *****
CPDPRG2       waltz16
NUC2          1H
PCPD2         84.00 usec
PL2           0.00 dB
PL12          19.00 dB
PL13          19.00 dB
SF02          500.1320005 MHz

F2 - Processing parameters
SI            32768
SF            125.7577390 MHz
WDW           EM
SSB           0
LB            2.00 Hz
GB            0
PC            1.00

1D NMR plot parameters
CX            22.00 cm
CY            7.00 cm
F1P          220.000 ppm
F1            27566.70 Hz
F2P          -8.000 ppm
F2           -1006.06 Hz
PPMCM        10.36364 ppm/cm
HZCM         1303.30750 Hz/cm
    
```

Fleckenstein CFP-6-99-b

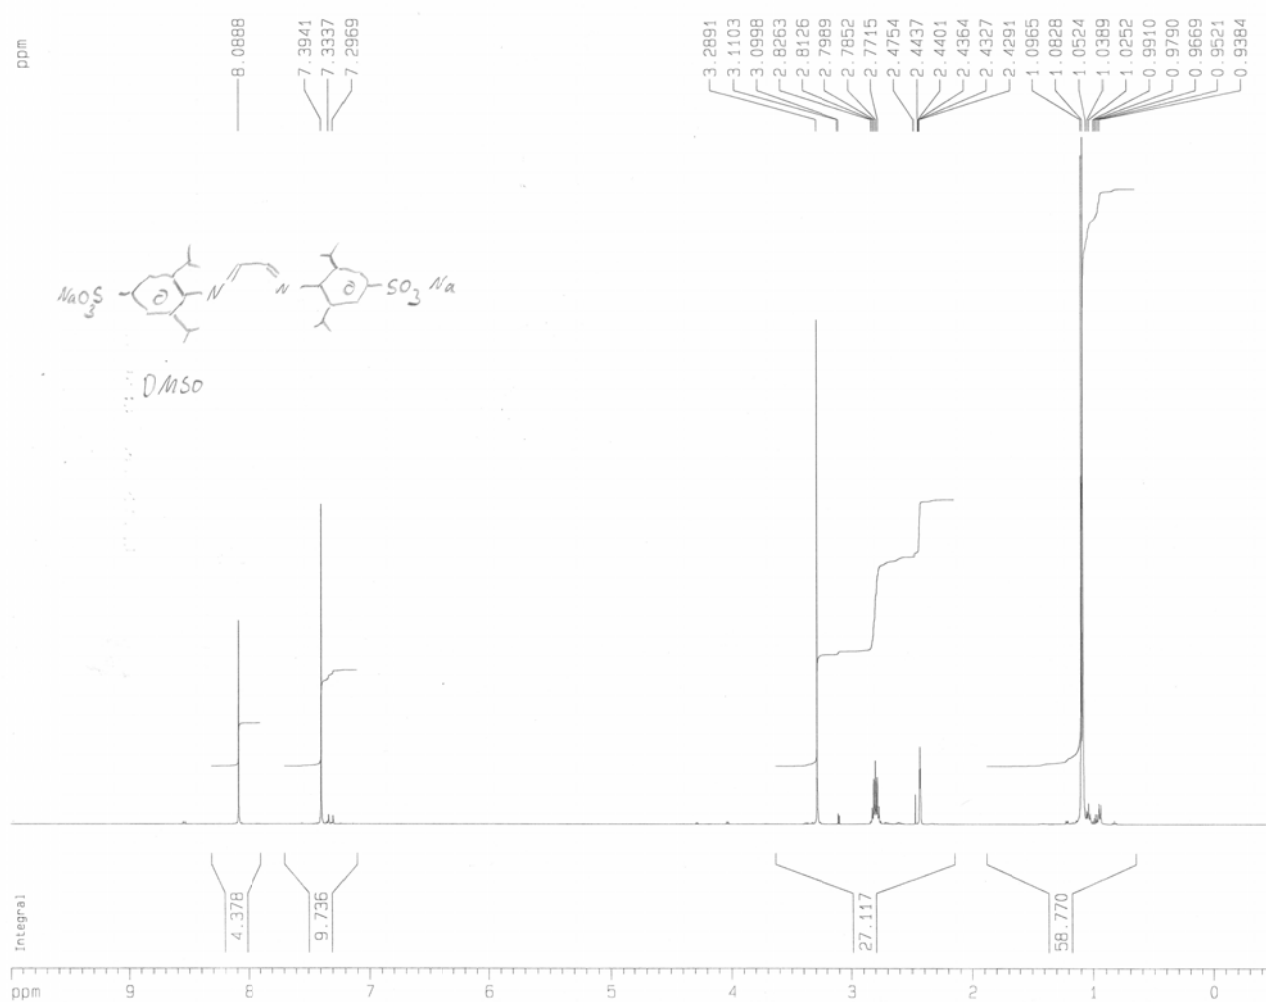

Current Data Parameters  
 NAME nov24av  
 EXPNO 40  
 PROCNO 1

F2 - Acquisition Parameters  
 Date\_ 20061124  
 Time 18.38  
 INSTRUM spect  
 PROBHD 5 mm BBO BB-1H  
 PULPROG zg30  
 TD 65536  
 SOLVENT DMSO  
 NS 32  
 DS 2  
 SWH 10330.578 Hz  
 FIDRES 0.157632 Hz  
 AQ 3.1720407 sec  
 RG 71.8  
 DW 48.400 usec  
 DE 6.00 usec  
 TE 300.0 K  
 D1 0.50000000 sec

===== CHANNEL f1 =====  
 NUC1 1H  
 P1 11.10 usec  
 PL1 0.00 dB  
 SFO1 500.1330885 MHz

F2 - Processing parameters  
 SI 32768  
 SF 500.1300351 MHz  
 WDW EM  
 SSB 0  
 LB 0.10 Hz  
 GB 0  
 PC 1.00

1D NMR plot parameters  
 CX 22.00 cm  
 CY 12.00 cm  
 F1P 10.000 ppm  
 F1 5001.30 Hz  
 F2P -0.500 ppm  
 F2 -250.06 Hz  
 PPMCM 0.47727 ppm/cm  
 HZCM 238.69841 Hz/cm

Fleckenstein CFP-6-99-b

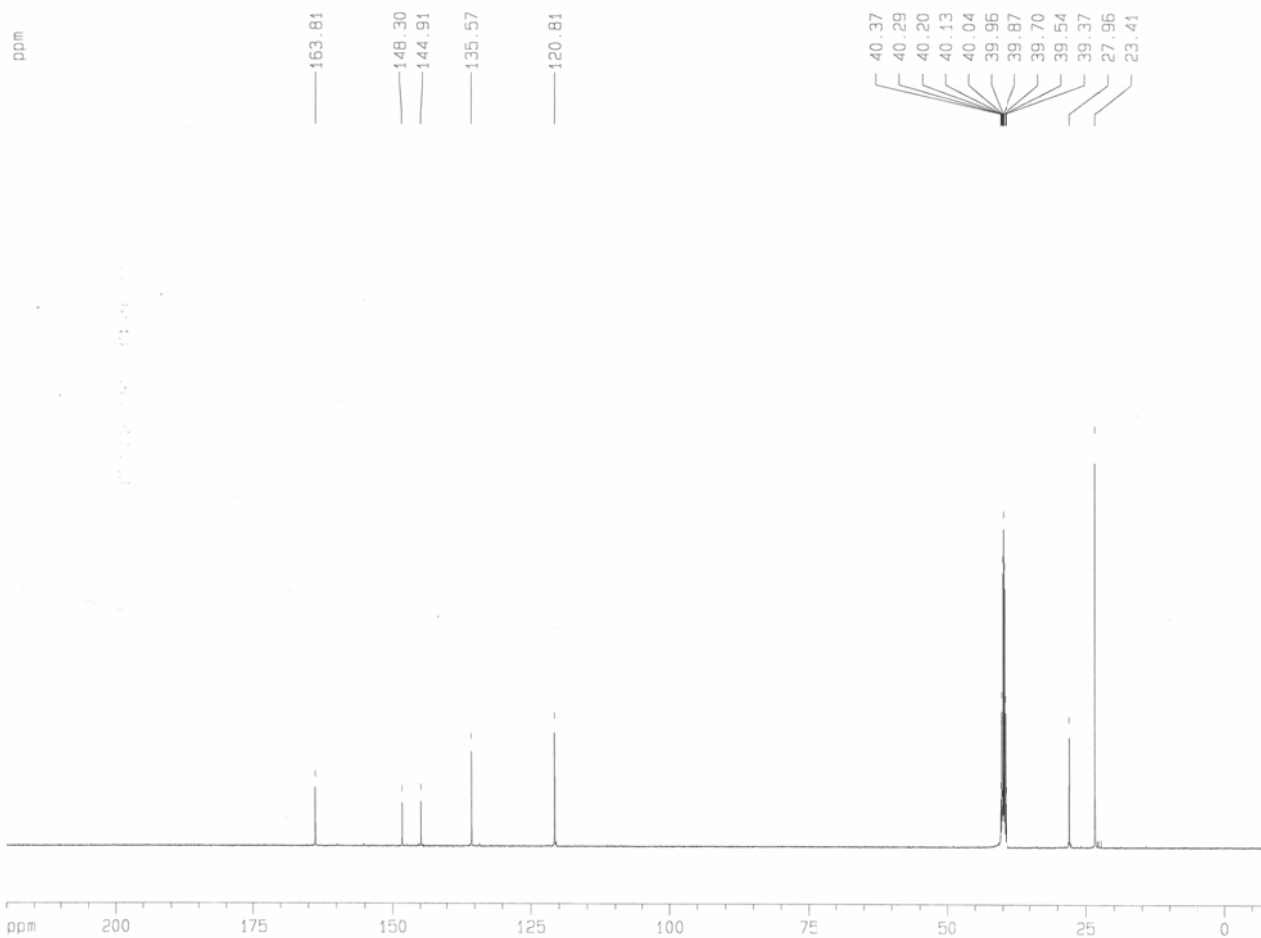

Current Data Parameters  
 NAME nov24av  
 EXPNO 41  
 PROCNO 1

F2 - Acquisition Parameters  
 Date\_ 20061124  
 Time 19.43  
 INSTRUM spect  
 PROBHD 5 mm BBO BB-1H  
 PULPROG zgpg30  
 TD 65536  
 SOLVENT DMSO  
 NS 3000  
 DS 4  
 SMH 37593.984 Hz  
 FIDRES 0.573639 Hz  
 AQ 0.8716921 sec  
 RG 8192  
 DW 13.300 usec  
 DE 6.00 usec  
 TE 300.0 K  
 D1 0.4000001 sec  
 d11 0.03000000 sec  
 d12 0.00002000 sec

\*\*\*\*\* CHANNEL f1 \*\*\*\*\*  
 NUC1 13C  
 P1 7.40 usec  
 PL1 4.00 dB  
 SF01 125.7703143 MHz

\*\*\*\*\* CHANNEL f2 \*\*\*\*\*  
 CPDPRG2 waltz16  
 NUC2 1H  
 PCPD2 84.00 usec  
 PL2 0.00 dB  
 PL12 19.00 dB  
 PL13 19.00 dB  
 SF02 500.1320005 MHz

F2 - Processing parameters  
 S1 32768  
 SF 125.7578019 MHz  
 WDW EM  
 SSB 0  
 LB 2.00 Hz  
 GB 0  
 PC 1.00

1D NMR plot parameters  
 CX 22.00 cm  
 CY 7.00 cm  
 F1P 220.000 ppm  
 F1 27656.72 Hz  
 F2P -8.000 ppm  
 F2 -1006.06 Hz  
 PPMCM 10.36364 ppm/cm  
 HZCM 1303.30823 Hz/cm
